# Supplementary material for: Density-functional studies of hydrogen peroxide adsorption and dissociation on MoO3(100) and H0.33MoO3(100) surfaces
Source: Royal Society of Chemistry journal article supplement (doi:10.1039/c5ra08006a), 2015-01-01
Supplement: c5ra08006a1.pdf [file c5ra08006a1.pdf]

**Density-functional studies of hydrogen peroxide adsorption and dissociation  
on MoO<sub>3</sub>(100) and H<sub>0.33</sub>MoO<sub>3</sub>(100) surfaces.**

**Supplemental Information**

Coordinates and energies for the B3LYP/LanL2DZ + 6-311++G(d,p) optimized geometries and transition states. See Tables 1, 2 and 3 for summaries and Figure 1, 2, 4, 5 and 6 in the text.

**Contents**

|                                                                                                                                |           |
|--------------------------------------------------------------------------------------------------------------------------------|-----------|
| <b>SECTION 1</b> .....                                                                                                         | <b>2</b>  |
| <b>A. Optimization Procedure</b> .....                                                                                         | <b>2</b>  |
| <b>SECTION 2</b> .....                                                                                                         | <b>3</b>  |
| <b>A. Mo<sub>6</sub>O<sub>23</sub>H<sub>10</sub> Cluster</b> .....                                                             | <b>3</b>  |
| <b>B. Mo<sub>10</sub>O<sub>36</sub>H<sub>12</sub> Cluster</b> .....                                                            | <b>5</b>  |
| <b>C. Mo<sub>6</sub>O<sub>23</sub>H<sub>10</sub> + 2H Hydrogen Bronze Cluster</b> .....                                        | <b>7</b>  |
| <b>SECTION 3</b> .....                                                                                                         | <b>9</b>  |
| <b>A. H<sub>2</sub>O<sub>2</sub> + Mo<sub>6</sub>O<sub>23</sub>H<sub>10</sub> “HOOH1” Structure</b> .....                      | <b>9</b>  |
| <b>B. H<sub>2</sub>O<sub>2</sub> + Mo<sub>6</sub>O<sub>23</sub>H<sub>10</sub> “HOOH2” Structure</b> .....                      | <b>11</b> |
| <b>C. H<sub>2</sub>O<sub>2</sub> + Mo<sub>10</sub>O<sub>36</sub>H<sub>12</sub> “HOOH3” Structure</b> .....                     | <b>13</b> |
| <b>D. H<sub>2</sub>O<sub>2</sub> + Mo<sub>10</sub>O<sub>36</sub>H<sub>12</sub> “HOOH1” Structure</b> .....                     | <b>15</b> |
| <b>E. H<sub>2</sub>O<sub>2</sub> + Mo<sub>10</sub>O<sub>36</sub>H<sub>12</sub> “HOOH2” Structure</b> .....                     | <b>17</b> |
| <b>F. H<sub>2</sub>O<sub>2</sub> + Mo<sub>10</sub>O<sub>36</sub>H<sub>12</sub> “HO-OH1” Structure</b> .....                    | <b>19</b> |
| <b>G. H<sub>2</sub>O<sub>2</sub> + Mo<sub>6</sub>O<sub>23</sub>H<sub>10</sub> “TS1-Oxide” Transition State Structure</b> ..... | <b>21</b> |
| <b>H. H<sub>2</sub>O<sub>2</sub> + Mo<sub>6</sub>O<sub>23</sub>H<sub>10</sub> “TS2-Oxide” Transition State Structure</b> ..... | <b>23</b> |
| <b>SECTION 4</b> .....                                                                                                         | <b>25</b> |
| <b>A. HOOH + Mo<sub>6</sub>O<sub>23</sub>H<sub>10</sub> + 2H Hydrogen Bronze “HOOH1” Structure</b> .....                       | <b>25</b> |
| <b>B. HOOH + Mo<sub>6</sub>O<sub>23</sub>H<sub>10</sub> + 2H Hydrogen Bronze “HOOH2” Structure</b> .....                       | <b>27</b> |
| <b>C. HOOH + Mo<sub>6</sub>O<sub>23</sub>H<sub>10</sub> + 2H Hydrogen Bronze “HOO-H1” Structure</b> .....                      | <b>29</b> |
| <b>D. HOOH + Mo<sub>6</sub>O<sub>23</sub>H<sub>10</sub> + 2H Hydrogen Bronze “HOO-H2” Structure</b> .....                      | <b>31</b> |
| <b>E. HOOH + Mo<sub>6</sub>O<sub>23</sub>H<sub>10</sub> + 2H Hydrogen Bronze “HO-OH2” Structure</b> .....                      | <b>33</b> |
| <b>F. HOOH + Mo<sub>6</sub>O<sub>23</sub>H<sub>10</sub> + 2H Hydrogen Bronze “HO-OH3” Structure</b> .....                      | <b>35</b> |
| <b>G. HOOH + Mo<sub>6</sub>O<sub>23</sub>H<sub>10</sub> + 2H Hydrogen Bronze “HO-OH4” Structure</b> .....                      | <b>37</b> |
| <b>H. HOOH + Mo<sub>6</sub>O<sub>23</sub>H<sub>10</sub> + 2H Hydrogen Bronze “HO-OH5” Structure</b> .....                      | <b>39</b> |
| <b>I. HOOH + Mo<sub>6</sub>O<sub>23</sub>H<sub>10</sub> + 2H Hydrogen Bronze “TS1” Transition State Structure</b> .....        | <b>41</b> |
| <b>J. HOOH + Mo<sub>6</sub>O<sub>23</sub>H<sub>10</sub> + 2H Hydrogen Bronze “TS2” Transition State Structure</b> .....        | <b>43</b> |
| <b>K. HOOH + Mo<sub>6</sub>O<sub>23</sub>H<sub>10</sub> + 2H Hydrogen Bronze “TS3” Transition State Structure</b> .....        | <b>45</b> |
| <b>L. HOOH + Mo<sub>6</sub>O<sub>23</sub>H<sub>10</sub> + 2H Hydrogen Bronze “TS4” Transition State Structure</b> .....        | <b>47</b> |
| <b>M. HOOH + Mo<sub>6</sub>O<sub>23</sub>H<sub>10</sub> + 2H Hydrogen Bronze “TS5” Transition State Structure</b> .....        | <b>49</b> |
| <b>N. HOOH + Mo<sub>6</sub>O<sub>23</sub>H<sub>10</sub> + 2H Hydrogen Bronze “TS6” Transition State Structure</b> .....        | <b>51</b> |
| <b>O. HOOH + Mo<sub>6</sub>O<sub>23</sub>H<sub>10</sub> + 2H Hydrogen Bronze “TS7” Transition State Structure</b> .....        | <b>53</b> |
| <b>P. HOOH + Mo<sub>6</sub>O<sub>23</sub>H<sub>10</sub> + 2H Hydrogen Bronze “TS8” Transition State Structure</b> .....        | <b>55</b> |
| <b>Q. HOOH + Mo<sub>6</sub>O<sub>23</sub>H<sub>10</sub> + 2H Hydrogen Bronze “TS9” Transition State Structure</b> .....        | <b>57</b> |
| <b>R. HOOH + Mo<sub>6</sub>O<sub>23</sub>H<sub>10</sub> + 2H Hydrogen Bronze “TS10” Transition State Structure</b> .....       | <b>59</b> |

Density-functional studies of hydrogen peroxide adsorption and dissociation on  $\text{MoO}_3(100)$  and  $\text{H}_{0.33}\text{MoO}_3(100)$  surfaces.

SECTION 1

A. Optimization Procedure

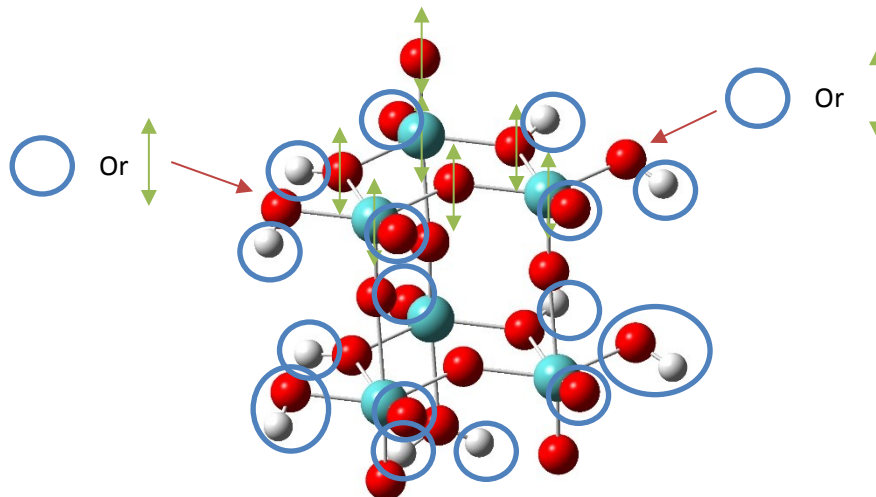

**Notations:**  atom or group is fully relaxed,  relaxation is allowed only in the vertical direction

**Computational procedure details**

1. The upper lattice (first layer) Mo and O atoms were allowed to relax in the direction perpendicular to the surface.
2. The lower lattice Mo and O atoms and the lower bridging O atoms, were kept fixed.
3. The lower terminal O and H atoms (including the -OH groups) were allowed to fully relax.
4. Two optimization methods were considered with respect to the terminal -OH groups at the surface: (1) both terminal -H, -O and -OH species were allowed to fully relax, or (2) the O atoms of the terminal -OH groups were allowed to relax only in the vertical direction (perpendicular to the surface), while the remaining atoms had no geometrical constraints. Since the first method resulted in unrealistic positions for the surface O atoms (see text), the structures reported in the paper were optimized using the second method.

Density-functional studies of hydrogen peroxide adsorption and dissociation on  $\text{MoO}_3(100)$  and  $\text{H}_{0.33}\text{MoO}_3(100)$  surfaces.

SECTION 2

A.  $\text{Mo}_6\text{O}_{23}\text{H}_{10}$  Cluster

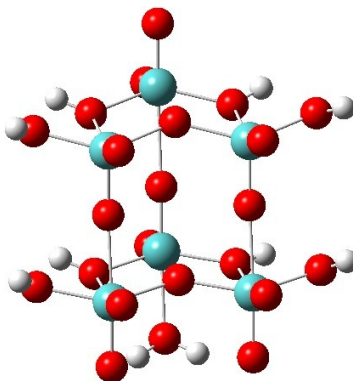

Total B3LYP Energy: -2142.61994446 Hartree

| Atom | Coordinates / Å |          |          |
|------|-----------------|----------|----------|
|      | X               | Y        | Z        |
| O    | 3.47202         | 0.56329  | 5.58746  |
| O    | 1.23364         | 0.40967  | 3.71348  |
| O    | 3.49361         | 0.59765  | 1.89105  |
| O    | 2.83011         | 2.64679  | 3.78549  |
| O    | 1.23364         | 0.40968  | 0.01751  |
| Mo   | 2.87054         | 0.95327  | 0.04074  |
| Mo   | 2.86886         | 0.95271  | 3.73669  |
| O    | 3.50511         | 0.60147  | -1.80713 |
| O    | 2.82524         | 2.64712  | 0.00951  |
| O    | -0.47875        | -0.21996 | -1.86347 |
| Mo   | -1.00437        | 0.16964  | -0.00898 |
| O    | -0.54415        | -0.24006 | 1.83901  |
| O    | -2.64986        | -0.37680 | -0.03233 |
| O    | -1.11651        | 1.87284  | -0.04671 |
| Mo   | -1.00437        | 0.16963  | 3.68699  |
| O    | -0.54073        | -0.23268 | 5.55109  |
| O    | -2.64985        | -0.37681 | 3.66364  |
| O    | -1.11578        | 1.87274  | 3.72372  |
| O    | 3.87995         | -1.16179 | 0.02877  |
| Mo   | 4.44443         | -1.53381 | 1.87832  |
| O    | -0.21182        | -2.02350 | -0.02409 |
| O    | 1.89389         | -1.88676 | 1.84728  |
| O    | 6.06191         | -1.00167 | 1.90121  |
| O    | 3.85817         | -1.16966 | 3.72446  |
| O    | 4.60120         | -3.22719 | 1.87900  |

Density-functional studies of hydrogen peroxide adsorption and dissociation on MoO<sub>3</sub>(100) and H<sub>0.33</sub>MoO<sub>3</sub>(100) surfaces.

| Atom | Coordinates / Å |          |          |
|------|-----------------|----------|----------|
|      | X               | Y        | Z        |
| Mo   | 0.24840         | -2.43320 | 1.82393  |
| O    | -1.98961        | -2.67323 | 1.79744  |
| O    | -0.21182        | -2.02350 | 3.67191  |
| O    | 0.42946         | -4.12319 | 1.84283  |
| H    | -0.37189        | 0.52724  | 6.11836  |
| H    | 3.54879         | 1.32388  | 6.17780  |
| H    | -2.41506        | -2.29935 | 1.00443  |
| H    | -0.00799        | -2.47617 | 4.49745  |
| H    | 4.24149         | -1.47220 | 4.55686  |
| H    | -2.43244        | -2.23428 | 2.54751  |
| H    | 3.58537         | 1.37347  | -2.38183 |
| H    | -0.31536        | 0.54765  | -2.42192 |
| H    | 4.31503         | -1.40407 | -0.79834 |
| H    | 0.23435         | -2.26348 | -0.84527 |

Density-functional studies of hydrogen peroxide adsorption and dissociation on  $\text{MoO}_3(100)$  and  $\text{H}_{0.33}\text{MoO}_3(100)$  surfaces.

**B.  $\text{Mo}_{10}\text{O}_{36}\text{H}_{12}$  Cluster**

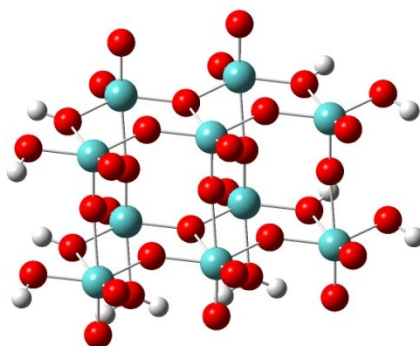

Total B3LYP Energy: -3392.59549584 Hartree

| Atom | Coordinates / Å |          |          |
|------|-----------------|----------|----------|
|      | X               | Y        | Z        |
| Mo   | -3.75702        | 1.53010  | -1.45738 |
| O    | -5.60935        | 1.91620  | -0.99424 |
| O    | -3.70752        | -0.12286 | -0.93582 |
| O    | -1.91441        | 2.01121  | -1.04749 |
| O    | -3.77842        | 1.41553  | -3.12431 |
| Mo   | -0.06147        | 1.58435  | -1.47072 |
| O    | -0.01197        | -0.06862 | -0.94916 |
| O    | 1.78115         | 2.06545  | -1.06083 |
| O    | -0.08287        | 1.46977  | -3.13765 |
| Mo   | 3.63411         | 1.63859  | -1.48405 |
| O    | 3.68361         | -0.01437 | -0.96250 |
| O    | 5.47672         | 2.11969  | -1.07416 |
| O    | 3.61271         | 1.52402  | -3.15099 |
| Mo   | 3.74373         | -2.25510 | -0.75622 |
| O    | 1.89077         | -1.82823 | -0.33299 |
| O    | 3.79323         | -3.90806 | -0.23466 |
| O    | 5.58635         | -1.77399 | -0.34633 |
| O    | 3.72233         | -2.36967 | -2.42315 |
| Mo   | 0.04815         | -2.30934 | -0.74288 |
| O    | -1.80478        | -1.88247 | -0.31965 |
| O    | 0.09765         | -3.96230 | -0.22132 |
| O    | 0.02676         | -2.42391 | -2.40981 |
| Mo   | -3.64740        | -2.36358 | -0.72955 |
| O    | -5.49973        | -1.97748 | -0.26640 |
| O    | -3.59790        | -4.01654 | -0.20799 |
| O    | -3.66879        | -2.47815 | -2.39648 |
| O    | 3.64599         | 2.39850  | 0.72065  |
| Mo   | 1.79305         | 2.82536  | 1.14388  |

Density-functional studies of hydrogen peroxide adsorption and dissociation on MoO<sub>3</sub>(100) and H<sub>0.33</sub>MoO<sub>3</sub>(100) surfaces.

| Atom | Coordinates / Å |          |          |
|------|-----------------|----------|----------|
|      | X               | Y        | Z        |
| O    | 3.75562         | -1.49534 | 1.44852  |
| O    | 1.85318         | 0.58449  | 1.35019  |
| O    | -0.04956        | 2.34426  | 0.73399  |
| O    | 1.74356         | 4.47832  | 0.62232  |
| O    | 1.81445         | 2.93993  | 2.81081  |
| Mo   | 1.90268         | -1.06848 | 1.87175  |
| Mo   | -1.90252        | 2.77112  | 1.15722  |
| O    | 1.96280         | -3.30920 | 2.07802  |
| O    | 0.06007         | -1.54958 | 1.46185  |
| O    | 1.92408         | -0.95391 | 3.53868  |
| O    | -1.84240        | 0.53024  | 1.36352  |
| O    | -1.95202        | 4.42408  | 0.63566  |
| O    | -3.74514        | 2.29002  | 0.74732  |
| O    | -1.88113        | 2.88569  | 2.82415  |
| Mo   | -1.79290        | -1.12272 | 1.88508  |
| O    | -1.73277        | -3.36344 | 2.09136  |
| O    | -3.63551        | -1.60382 | 1.47519  |
| O    | -1.77150        | -1.00815 | 3.55201  |
| H    | 6.07285         | 1.57029  | -1.58835 |
| H    | 6.18248         | -2.32339 | -0.86051 |
| H    | -6.08299        | -2.52658 | -0.79545 |
| H    | -6.19261        | 1.36710  | -1.52329 |
| H    | -0.88887        | -3.81931 | 2.13145  |
| H    | 1.14454         | -3.80895 | 2.12590  |
| H    | -4.42816        | -1.21154 | 1.84859  |
| H    | 4.54261         | -1.08359 | 1.81281  |
| H    | 4.43298         | 2.81025  | 1.08495  |
| H    | -4.53778        | 2.68230  | 1.12073  |
| H    | -2.55104        | -3.86319 | 2.13924  |
| H    | 2.80671         | -3.76507 | 2.11811  |

Density-functional studies of hydrogen peroxide adsorption and dissociation on MoO<sub>3</sub>(100) and H<sub>0.33</sub>MoO<sub>3</sub>(100) surfaces.

C. Mo<sub>6</sub>O<sub>23</sub>H<sub>10</sub> + 2H Hydrogen Bronze Cluster

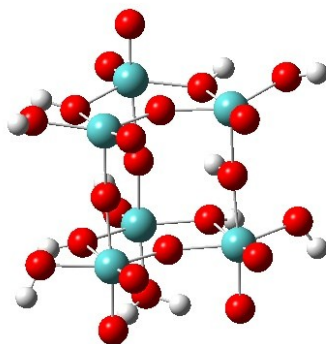

Total B3LYP Energy: -2143.62643222 Hartree

| Atom | Coordinates / Å |         |          |
|------|-----------------|---------|----------|
|      | X               | Y       | Z        |
| O    | 0.08291         | 5.80887 | 3.73617  |
| O    | 0.36310         | 8.26351 | 5.58070  |
| O    | -1.86470        | 8.01304 | 3.52094  |
| Mo   | -0.10311        | 3.86863 | 3.72000  |
| O    | 0.18602         | 1.94025 | 3.73617  |
| O    | 0.48023         | 3.86863 | 1.85930  |
| O    | 0.35805         | 4.08273 | 5.63378  |
| O    | -1.79674        | 3.99081 | 3.66175  |
| O    | 0.08291         | 5.80887 | 0.01617  |
| O    | 0.36332         | 8.25531 | -1.86070 |
| O    | -1.86421        | 8.02318 | 0.19421  |
| Mo   | -0.10311        | 3.86863 | 0.00000  |
| Mo   | -0.20821        | 7.81209 | 0.00000  |
| O    | 0.18602         | 1.94025 | 0.01617  |
| Mo   | -0.20832        | 7.81619 | 3.72000  |
| O    | 0.36727         | 4.09068 | -1.90801 |
| O    | -1.79789        | 3.98349 | 0.03534  |
| O    | 2.52013         | 5.86430 | 1.87546  |
| O    | 2.41408         | 9.84349 | 1.84222  |
| O    | 4.39611         | 8.06082 | 1.86317  |
| Mo   | 2.80924         | 3.93672 | 1.85930  |
| O    | 2.62324         | 1.99568 | 1.87546  |
| O    | 0.37200         | 7.92936 | 1.85930  |
| O    | 2.22673         | 3.90565 | -0.00141 |
| O    | 2.22590         | 3.93672 | 3.72000  |
| O    | 2.12388         | 7.76474 | -0.00141 |
| Mo   | 2.69691         | 8.15127 | 1.85930  |
| O    | 2.12348         | 7.77969 | 3.72000  |
| O    | 4.49768         | 3.81972 | 1.85407  |

Density-functional studies of hydrogen peroxide adsorption and dissociation on MoO<sub>3</sub>(100) and H<sub>0.33</sub>MoO<sub>3</sub>(100) surfaces.

| Atom | Coordinates / Å |         |          |
|------|-----------------|---------|----------|
|      | X               | Y       | Z        |
| H    | 2.55691         | 8.08262 | 4.52777  |
| H    | -0.31867        | 8.45085 | 6.24003  |
| H    | 2.03537         | 1.70928 | 2.63720  |
| H    | 2.04477         | 1.70398 | 1.10856  |
| H    | 2.63847         | 3.67967 | 4.55351  |
| H    | 0.28073         | 3.25369 | 6.11964  |
| H    | 2.55879         | 8.05255 | -0.81358 |
| H    | -0.31824        | 8.44953 | -2.51823 |
| H    | 0.26178         | 3.27388 | -2.40926 |
| H    | 2.65907         | 3.74358 | -0.84840 |
| H    | 1.05390         | 5.88113 | 3.56160  |
| H    | 1.02034         | 5.87716 | 0.32848  |



Density-functional studies of hydrogen peroxide adsorption and dissociation on MoO<sub>3</sub>(100) and H<sub>0.33</sub>MoO<sub>3</sub>(100) surfaces.

SECTION 3

A. H<sub>2</sub>O<sub>2</sub> + Mo<sub>6</sub>O<sub>23</sub>H<sub>10</sub> “HOOH1” Structure

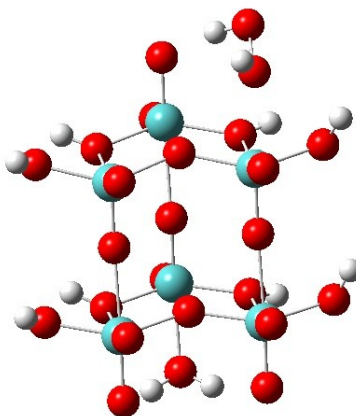

Total B3LYP Energy: -2294.24398027 Hartree BSSE correction: 0.005942359895 Hartree

| Atom | Coordinates / Å |          |          |
|------|-----------------|----------|----------|
|      | X               | Y        | Z        |
| O    | 3.32566         | 0.51469  | 5.58534  |
| O    | 1.23364         | 0.40967  | 3.71348  |
| O    | 3.46476         | 0.58807  | 1.89063  |
| O    | 2.81288         | 2.65457  | 3.71873  |
| O    | 1.23364         | 0.40968  | 0.01751  |
| Mo   | 2.86806         | 0.95244  | 0.04070  |
| Mo   | 2.87722         | 0.95549  | 3.73681  |
| O    | 3.51681         | 0.60536  | -1.80713 |
| O    | 2.83333         | 2.64804  | 0.01315  |
| O    | -0.47119        | -0.23575 | -1.86134 |
| Mo   | -1.00437        | 0.16964  | -0.00898 |
| O    | -0.54415        | -0.24006 | 1.83901  |
| O    | -2.64986        | -0.37680 | -0.03233 |
| O    | -1.11683        | 1.87205  | -0.06325 |
| Mo   | -1.00437        | 0.16963  | 3.68699  |
| O    | -0.60080        | -0.17996 | 5.56271  |
| O    | -2.64985        | -0.37681 | 3.66364  |
| O    | -1.10572        | 1.87312  | 3.63147  |
| O    | 3.80798         | -1.18780 | 0.02773  |
| Mo   | 4.32507         | -1.57694 | 1.87658  |
| O    | -0.21182        | -2.02350 | -0.02409 |
| O    | 1.89389         | -1.88676 | 1.84728  |
| O    | 5.96041         | -1.03686 | 1.89975  |
| O    | 3.80305         | -1.18958 | 3.72366  |
| O    | 4.48914         | -3.26706 | 1.86838  |

Density-functional studies of hydrogen peroxide adsorption and dissociation on MoO<sub>3</sub>(100) and H<sub>0.33</sub>MoO<sub>3</sub>(100) surfaces.

| Atom | Coordinates / Å |          |          |
|------|-----------------|----------|----------|
|      | X               | Y        | Z        |
| Mo   | 0.24840         | -2.43320 | 1.82393  |
| O    | -1.98961        | -2.67323 | 1.79744  |
| O    | -0.21182        | -2.02350 | 3.67191  |
| O    | 0.41669         | -4.12409 | 1.85336  |
| H    | 0.08721         | 0.34587  | 5.98551  |
| H    | 3.93582         | 1.12229  | 6.02450  |
| H    | -2.39986        | -2.35436 | 0.97354  |
| H    | -0.29192        | -2.60069 | 4.43881  |
| H    | 4.04575         | -1.59681 | 4.56315  |
| H    | -2.43907        | -2.17008 | 2.50392  |
| H    | 3.60386         | 1.38007  | -2.37677 |
| H    | -0.33042        | 0.52931  | -2.42929 |
| H    | 4.24516         | -1.44698 | -0.79344 |
| H    | 0.25814         | -2.23035 | -0.84166 |
| O    | 5.31049         | 1.62570  | 3.87364  |
| H    | 5.58604         | 2.46653  | 3.47947  |
| O    | 6.52598         | 0.85136  | 3.93130  |
| H    | 6.43641         | 0.26172  | 3.15259  |

Density-functional studies of hydrogen peroxide adsorption and dissociation on MoO<sub>3</sub>(100) and H<sub>0.33</sub>MoO<sub>3</sub>(100) surfaces.

B. H<sub>2</sub>O<sub>2</sub> + Mo<sub>6</sub>O<sub>23</sub>H<sub>10</sub> “HOOH2” Structure

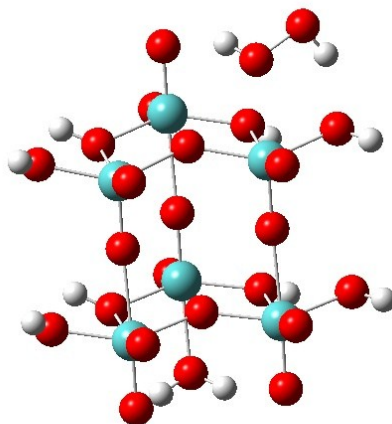

Total B3LYP Energy: -2294.24850922 Hartree BSSE correction: 0.006968162818 Hartree

| Atom | Coordinates / Å |          |          |
|------|-----------------|----------|----------|
|      | X               | Y        | Z        |
| O    | 3.41666         | 0.54491  | 5.58666  |
| O    | 1.23364         | 0.40967  | 3.71348  |
| O    | 3.47547         | 0.59162  | 1.89079  |
| O    | 2.73306         | 2.64425  | 3.78113  |
| O    | 1.23364         | 0.40968  | 0.01751  |
| Mo   | 2.87052         | 0.95326  | 0.04074  |
| Mo   | 2.88393         | 0.95771  | 3.73690  |
| O    | 3.51833         | 0.60586  | -1.80713 |
| O    | 2.82831         | 2.64680  | 0.00375  |
| O    | -0.48137        | -0.22797 | -1.86179 |
| Mo   | -1.00437        | 0.16964  | -0.00898 |
| O    | -0.54415        | -0.24006 | 1.83901  |
| O    | -2.64986        | -0.37680 | -0.03233 |
| O    | -1.11710        | 1.87211  | -0.04461 |
| Mo   | -1.00437        | 0.16963  | 3.68699  |
| O    | -0.54111        | -0.23154 | 5.55661  |
| O    | -2.64985        | -0.37681 | 3.66364  |
| O    | -1.15172        | 1.86864  | 3.72772  |
| O    | 3.78551         | -1.19592 | 0.02740  |
| Mo   | 4.30142         | -1.58549 | 1.87624  |
| O    | -0.21182        | -2.02350 | -0.02409 |
| O    | 1.89389         | -1.88676 | 1.84728  |
| O    | 5.93161         | -1.04684 | 1.89934  |
| O    | 3.76630         | -1.20286 | 3.72313  |
| O    | 4.43596         | -3.28040 | 1.88277  |
| Mo   | 0.24840         | -2.43320 | 1.82393  |

Density-functional studies of hydrogen peroxide adsorption and dissociation on MoO<sub>3</sub>(100) and H<sub>0.33</sub>MoO<sub>3</sub>(100) surfaces.

| Atom | Coordinates / Å |          |          |
|------|-----------------|----------|----------|
|      | X               | Y        | Z        |
| O    | -1.98961        | -2.67323 | 1.79744  |
| O    | -0.21182        | -2.02350 | 3.67191  |
| O    | 0.41113         | -4.12422 | 1.86206  |
| H    | -0.82457        | 0.43946  | 6.18877  |
| H    | 3.04601         | 1.12842  | 6.26286  |
| H    | -2.39244        | -2.39400 | 0.95615  |
| H    | -0.41290        | -2.62101 | 4.40071  |
| H    | 3.38709         | -1.85965 | 4.31864  |
| H    | -2.44942        | -2.14067 | 2.47554  |
| H    | 3.63989         | 1.38463  | -2.36501 |
| H    | -0.25733        | 0.53285  | -2.40847 |
| H    | 4.26688         | -1.41454 | -0.78115 |
| H    | 0.27755         | -2.21448 | -0.83467 |
| O    | 5.33322         | 1.23067  | 3.72919  |
| H    | 5.81149         | 0.60624  | 3.15171  |
| O    | 5.99478         | 1.03368  | 5.00002  |
| H    | 5.23262         | 0.69961  | 5.52345  |

Density-functional studies of hydrogen peroxide adsorption and dissociation on MoO<sub>3</sub>(100) and H<sub>0.33</sub>MoO<sub>3</sub>(100) surfaces.

C. H<sub>2</sub>O<sub>2</sub> + Mo<sub>10</sub>O<sub>36</sub>H<sub>12</sub> “HOOH3” Structure

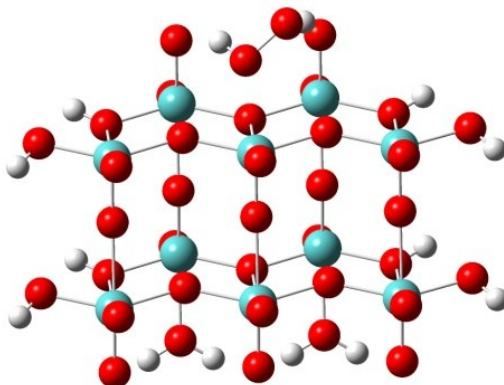

Total B3LYP Energy: -3544.23655985 Hartree BSSE correction: 0.00820678 Hartree

| Atom | Coordinates / Å |           |          |
|------|-----------------|-----------|----------|
|      | X               | Y         | Z        |
| Mo   | -1.11813        | -0.98716  | 0.37864  |
| O    | -1.52042        | 0.86127   | -0.08635 |
| O    | 0.56723         | -0.98714  | -0.02916 |
| O    | -1.52155        | -2.83529  | -0.08652 |
| O    | -1.11793        | -0.98691  | 2.04964  |
| Mo   | -1.07588        | -4.68270  | 0.34143  |
| O    | 0.60949         | -4.68268  | -0.06636 |
| O    | -1.47930        | -6.53083  | -0.12373 |
| O    | -1.07568        | -4.68246  | 2.01243  |
| Mo   | -1.03363        | -8.37827  | 0.30423  |
| O    | 0.65174         | -8.37825  | -0.10357 |
| O    | -1.43705        | -10.22640 | -0.16093 |
| O    | -1.03342        | -8.37803  | 1.97523  |
| Mo   | 2.90211         | -8.37847  | -0.15675 |
| O    | 2.45644         | -6.53103  | -0.58470 |
| O    | 4.58748         | -8.37846  | -0.56454 |
| O    | 2.49869         | -10.22660 | -0.62191 |
| O    | 2.90232         | -8.37823  | 1.51425  |
| Mo   | 2.85986         | -4.68290  | -0.11955 |
| O    | 2.41419         | -2.83549  | -0.54750 |
| O    | 4.54522         | -4.68288  | -0.52734 |
| O    | 2.86006         | -4.68266  | 1.55146  |
| Mo   | 2.81760         | -0.98736  | -0.08234 |
| O    | 2.41532         | 0.86106   | -0.54733 |
| O    | 4.50297         | -0.98734  | -0.49013 |
| O    | 2.81781         | -0.98712  | 1.58866  |
| O    | -1.64108        | -8.37763  | -1.94729 |

Density-functional studies of hydrogen peroxide adsorption and dissociation on MoO<sub>3</sub>(100) and H<sub>0.33</sub>MoO<sub>3</sub>(100) surfaces.

| Atom | Coordinates / Å |           |          |
|------|-----------------|-----------|----------|
|      | X               | Y         | Z        |
| Mo   | -2.08676        | -6.53021  | -2.37524 |
| O    | 2.29481         | -8.37783  | -2.40828 |
| O    | 0.16377         | -6.53044  | -2.42845 |
| O    | -1.68334        | -4.68208  | -1.91009 |
| O    | -3.77212        | -6.53023  | -1.96745 |
| O    | -2.08696        | -6.53046  | -4.04624 |
| Mo   | 1.84914         | -6.53042  | -2.83624 |
| Mo   | -2.12901        | -2.83464  | -2.33804 |
| O    | 4.09951         | -6.53064  | -2.88942 |
| O    | 2.25256         | -4.68229  | -2.37108 |
| O    | 1.84894         | -6.53066  | -4.50724 |
| O    | 0.12152         | -2.83487  | -2.39124 |
| O    | -3.81438        | -2.83466  | -1.93025 |
| O    | -1.72559        | -0.98651  | -1.87288 |
| O    | -2.12921        | -2.83488  | -4.00904 |
| Mo   | 1.80689         | -2.83485  | -2.79903 |
| O    | 4.05726         | -2.83507  | -2.85222 |
| O    | 2.21031         | -0.98672  | -2.33388 |
| O    | 1.80668         | -2.83509  | -4.47003 |
| H    | -0.90843        | -10.81575 | 0.38206  |
| H    | 3.02731         | -10.81595 | -0.07892 |
| H    | 2.91159         | 1.45038   | 0.02540  |
| H    | -1.02415        | 1.45059   | 0.48638  |
| H    | 4.53685         | -3.66647  | -2.87170 |
| H    | 4.57965         | -5.69935  | -2.89263 |
| H    | 1.82364         | -0.19898  | -2.72318 |
| H    | 1.92968         | -9.16969  | -2.80984 |
| H    | -2.00622        | -9.16948  | -2.34885 |
| H    | -2.11226        | -0.19878  | -2.26219 |
| H    | 4.53740         | -2.00378  | -2.85542 |
| H    | 4.57910         | -7.36204  | -2.90890 |
| O    | -3.48856        | -4.89764  | 0.37144  |
| H    | -3.90572        | -5.50569  | -0.27466 |
| O    | -4.43576        | -3.83438  | 0.56539  |
| H    | -4.36476        | -3.34426  | -0.28536 |

Density-functional studies of hydrogen peroxide adsorption and dissociation on MoO<sub>3</sub>(100) and H<sub>0.33</sub>MoO<sub>3</sub>(100) surfaces.

D. H<sub>2</sub>O<sub>2</sub> + Mo<sub>10</sub>O<sub>36</sub>H<sub>12</sub> “HOOH1” Structure

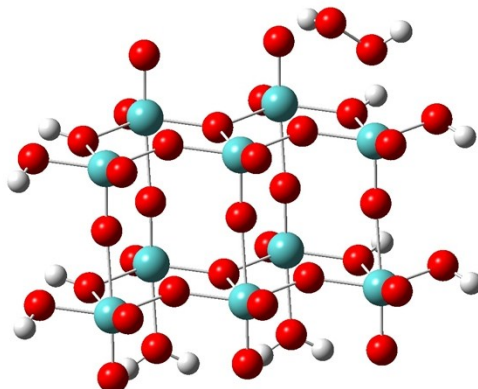

Total B3LYP Energy: -3544.23048866 Hartree BSSE correction: 0.00656181 Hartree

| Atom | Coordinates / Å |           |          |
|------|-----------------|-----------|----------|
|      | X               | Y         | Z        |
| Mo   | -1.11813        | -0.98716  | 0.37864  |
| O    | -1.52042        | 0.86127   | -0.08635 |
| O    | 0.56723         | -0.98714  | -0.02916 |
| O    | -1.52155        | -2.83529  | -0.08652 |
| O    | -1.11793        | -0.98691  | 2.04964  |
| Mo   | -1.07588        | -4.68270  | 0.34143  |
| O    | 0.60949         | -4.68268  | -0.06636 |
| O    | -1.47930        | -6.53083  | -0.12373 |
| O    | -1.07568        | -4.68246  | 2.01243  |
| Mo   | -1.03363        | -8.37827  | 0.30423  |
| O    | 0.65174         | -8.37825  | -0.10357 |
| O    | -1.43705        | -10.22640 | -0.16093 |
| O    | -1.03342        | -8.37803  | 1.97523  |
| Mo   | 2.90211         | -8.37847  | -0.15675 |
| O    | 2.45644         | -6.53103  | -0.58470 |
| O    | 4.58748         | -8.37846  | -0.56454 |
| O    | 2.49869         | -10.22660 | -0.62191 |
| O    | 2.90232         | -8.37823  | 1.51425  |
| Mo   | 2.85986         | -4.68290  | -0.11955 |
| O    | 2.41419         | -2.83549  | -0.54750 |
| O    | 4.54522         | -4.68288  | -0.52734 |
| O    | 2.86006         | -4.68266  | 1.55146  |
| Mo   | 2.81760         | -0.98736  | -0.08234 |
| O    | 2.41532         | 0.86106   | -0.54733 |
| O    | 4.50297         | -0.98734  | -0.49013 |

Density-functional studies of hydrogen peroxide adsorption and dissociation on MoO<sub>3</sub>(100) and H<sub>0.33</sub>MoO<sub>3</sub>(100) surfaces.

| Atom | Coordinates / Å |           |          |
|------|-----------------|-----------|----------|
|      | X               | Y         | Z        |
| O    | 2.81781         | -0.98712  | 1.58866  |
| O    | -1.64108        | -8.37763  | -1.94729 |
| Mo   | -2.08676        | -6.53021  | -2.37524 |
| O    | 2.29481         | -8.37783  | -2.40828 |
| O    | 0.16377         | -6.53044  | -2.42845 |
| O    | -1.68334        | -4.68208  | -1.91009 |
| O    | -3.77212        | -6.53023  | -1.96745 |
| O    | -2.08696        | -6.53046  | -4.04624 |
| Mo   | 1.84914         | -6.53042  | -2.83624 |
| Mo   | -2.12901        | -2.83464  | -2.33804 |
| O    | 4.09951         | -6.53064  | -2.88942 |
| O    | 2.25256         | -4.68229  | -2.37108 |
| O    | 1.84894         | -6.53066  | -4.50724 |
| O    | 0.12152         | -2.83487  | -2.39124 |
| O    | -3.81438        | -2.83466  | -1.93025 |
| O    | -1.72559        | -0.98651  | -1.87288 |
| O    | -2.12921        | -2.83488  | -4.00904 |
| Mo   | 1.80689         | -2.83485  | -2.79903 |
| O    | 4.05726         | -2.83507  | -2.85222 |
| O    | 2.21031         | -0.98672  | -2.33388 |
| O    | 1.80668         | -2.83509  | -4.47003 |
| H    | -0.90843        | -10.81575 | 0.38206  |
| H    | 3.02731         | -10.81595 | -0.07892 |
| H    | 2.91159         | 1.45038   | 0.02540  |
| H    | -1.02415        | 1.45059   | 0.48638  |
| H    | 4.53685         | -3.66647  | -2.87170 |
| H    | 4.57965         | -5.69935  | -2.89263 |
| H    | 1.82364         | -0.19898  | -2.72318 |
| H    | 1.92968         | -9.16969  | -2.80984 |
| H    | -2.00622        | -9.16948  | -2.34885 |
| H    | -2.11226        | -0.19878  | -2.26219 |
| H    | 4.53740         | -2.00378  | -2.85542 |
| H    | 4.57910         | -7.36204  | -2.90890 |
| O    | -4.37841        | -2.03350  | 0.64473  |
| H    | -4.45428        | -2.40298  | -0.26437 |
| O    | -3.54198        | -0.89076  | 0.35106  |
| H    | -3.99307        | -0.16625  | 0.80721  |



Density-functional studies of hydrogen peroxide adsorption and dissociation on  $\text{MoO}_3(100)$  and  $\text{H}_{0.33}\text{MoO}_3(100)$  surfaces.

E.  $\text{H}_2\text{O}_2 + \text{Mo}_{10}\text{O}_{36}\text{H}_{12}$  “ $\text{HOOH}_2$ ” Structure

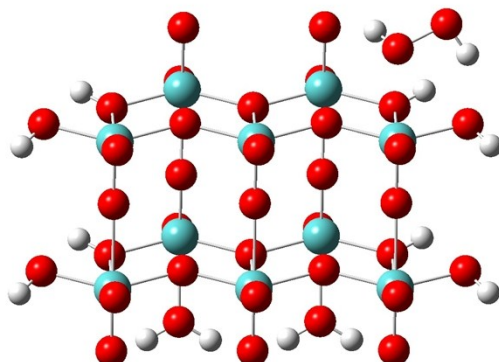

Total B3LYP Energy: -3544.23242632 Hartree BSSE correction: 0.00655391 Hartree

| Atom | Coordinates / Å |           |          |
|------|-----------------|-----------|----------|
|      | X               | Y         | Z        |
| Mo   | -1.11813        | -0.98716  | 0.37864  |
| O    | -1.52042        | 0.86127   | -0.08635 |
| O    | 0.56723         | -0.98714  | -0.02916 |
| O    | -1.52155        | -2.83529  | -0.08652 |
| O    | -1.11793        | -0.98691  | 2.04964  |
| Mo   | -1.07588        | -4.68270  | 0.34143  |
| O    | 0.60949         | -4.68268  | -0.06636 |
| O    | -1.47930        | -6.53083  | -0.12373 |
| O    | -1.07568        | -4.68246  | 2.01243  |
| Mo   | -1.03363        | -8.37827  | 0.30423  |
| O    | 0.65174         | -8.37825  | -0.10357 |
| O    | -1.43705        | -10.22640 | -0.16093 |
| O    | -1.03342        | -8.37803  | 1.97523  |
| Mo   | 2.90211         | -8.37847  | -0.15675 |
| O    | 2.45644         | -6.53103  | -0.58470 |
| O    | 4.58748         | -8.37846  | -0.56454 |
| O    | 2.49869         | -10.22660 | -0.62191 |
| O    | 2.90232         | -8.37823  | 1.51425  |
| Mo   | 2.85986         | -4.68290  | -0.11955 |
| O    | 2.41419         | -2.83549  | -0.54750 |
| O    | 4.54522         | -4.68288  | -0.52734 |
| O    | 2.86006         | -4.68266  | 1.55146  |
| Mo   | 2.81760         | -0.98736  | -0.08234 |
| O    | 2.41532         | 0.86106   | -0.54733 |
| O    | 4.50297         | -0.98734  | -0.49013 |
| O    | 2.81781         | -0.98712  | 1.58866  |

Density-functional studies of hydrogen peroxide adsorption and dissociation on MoO<sub>3</sub>(100) and H<sub>0.33</sub>MoO<sub>3</sub>(100) surfaces.

| Atom | Coordinates / Å |           |          |
|------|-----------------|-----------|----------|
|      | X               | Y         | Z        |
| O    | -1.64108        | -8.37763  | -1.94729 |
| Mo   | -2.08676        | -6.53021  | -2.37524 |
| O    | 2.29481         | -8.37783  | -2.40828 |
| O    | 0.16377         | -6.53044  | -2.42845 |
| O    | -1.68334        | -4.68208  | -1.91009 |
| O    | -3.77212        | -6.53023  | -1.96745 |
| O    | -2.08696        | -6.53046  | -4.04624 |
| Mo   | 1.84914         | -6.53042  | -2.83624 |
| O    | -2.12901        | -2.83464  | -2.33804 |
| O    | 4.09951         | -6.53064  | -2.88942 |
| O    | 2.25256         | -4.68229  | -2.37108 |
| O    | 1.84894         | -6.53066  | -4.50724 |
| O    | 0.12152         | -2.83487  | -2.39124 |
| O    | -3.81438        | -2.83466  | -1.93025 |
| O    | -1.72559        | -0.98651  | -1.87288 |
| O    | -2.12921        | -2.83488  | -4.00904 |
| Mo   | 1.80689         | -2.83485  | -2.79903 |
| O    | 4.05726         | -2.83507  | -2.85222 |
| O    | 2.21031         | -0.98672  | -2.33388 |
| O    | 1.80668         | -2.83509  | -4.47003 |
| H    | -0.90843        | -10.81575 | 0.38206  |
| H    | 3.02731         | -10.81595 | -0.07892 |
| H    | 2.91159         | 1.45038   | 0.02540  |
| H    | -1.02415        | 1.45059   | 0.48638  |
| H    | 4.53685         | -3.66647  | -2.87170 |
| H    | 4.57965         | -5.69935  | -2.89263 |
| H    | 1.82364         | -0.19898  | -2.72318 |
| H    | 1.92968         | -9.16969  | -2.80984 |
| H    | -2.00622        | -9.16948  | -2.34885 |
| H    | -2.11226        | -0.19878  | -2.26219 |
| H    | 4.53740         | -2.00378  | -2.85542 |
| H    | 4.57910         | -7.36204  | -2.90890 |
| O    | -4.16762        | 0.27300   | 0.07820  |
| H    | -3.36500        | 0.83430   | -0.00076 |
| O    | -3.54298        | -1.00531  | 0.35458  |
| H    | -3.91457        | -1.57709  | -0.35007 |

Density-functional studies of hydrogen peroxide adsorption and dissociation on MoO<sub>3</sub>(100) and H<sub>0.33</sub>MoO<sub>3</sub>(100) surfaces.

F. H<sub>2</sub>O<sub>2</sub> + Mo<sub>10</sub>O<sub>36</sub>H<sub>12</sub> “HO-OH1” Structure

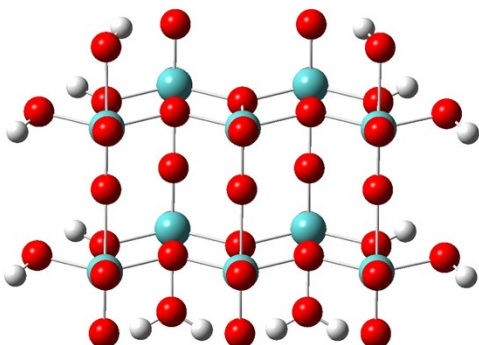

Total B3LYP Energy: -3544.09266029 Hartree

| Atom | Coordinates / Å |           |          |
|------|-----------------|-----------|----------|
|      | X               | Y         | Z        |
| Mo   | -1.11813        | -0.98716  | 0.37864  |
| O    | -1.52042        | 0.86127   | -0.08635 |
| O    | 0.56723         | -0.98714  | -0.02916 |
| O    | -1.52155        | -2.83529  | -0.08652 |
| O    | -1.11793        | -0.98691  | 2.04964  |
| Mo   | -1.07588        | -4.68270  | 0.34143  |
| O    | 0.60949         | -4.68268  | -0.06636 |
| O    | -1.47930        | -6.53083  | -0.12373 |
| O    | -1.07568        | -4.68246  | 2.01243  |
| Mo   | -1.03363        | -8.37827  | 0.30423  |
| O    | 0.65174         | -8.37825  | -0.10357 |
| O    | -1.43705        | -10.22640 | -0.16093 |
| O    | -1.03342        | -8.37803  | 1.97523  |
| Mo   | 2.90211         | -8.37847  | -0.15675 |
| O    | 2.45644         | -6.53103  | -0.58470 |
| O    | 4.58748         | -8.37846  | -0.56454 |
| O    | 2.49869         | -10.22660 | -0.62191 |
| O    | 2.90232         | -8.37823  | 1.51425  |
| Mo   | 2.85986         | -4.68290  | -0.11955 |
| O    | 2.41419         | -2.83549  | -0.54750 |
| O    | 4.54522         | -4.68288  | -0.52734 |
| O    | 2.86006         | -4.68266  | 1.55146  |
| Mo   | 2.81760         | -0.98736  | -0.08234 |
| O    | 2.41532         | 0.86106   | -0.54733 |
| O    | 4.50297         | -0.98734  | -0.49013 |
| O    | 2.81781         | -0.98712  | 1.58866  |
| O    | -1.64108        | -8.37763  | -1.94729 |

Density-functional studies of hydrogen peroxide adsorption and dissociation on MoO<sub>3</sub>(100) and H<sub>0.33</sub>MoO<sub>3</sub>(100) surfaces.

| Atom | Coordinates / Å |           |          |
|------|-----------------|-----------|----------|
|      | X               | Y         | Z        |
| Mo   | -2.08676        | -6.53021  | -2.37524 |
| O    | 2.29481         | -8.37783  | -2.40828 |
| O    | 0.16377         | -6.53044  | -2.42845 |
| O    | -1.68334        | -4.68208  | -1.91009 |
| O    | -3.77212        | -6.53023  | -1.96745 |
| O    | -2.08696        | -6.53046  | -4.04624 |
| Mo   | 1.84914         | -6.53042  | -2.83624 |
| Mo   | -2.12901        | -2.83464  | -2.33804 |
| O    | 4.09951         | -6.53064  | -2.88942 |
| O    | 2.25256         | -4.68229  | -2.37108 |
| O    | 1.84894         | -6.53066  | -4.50724 |
| O    | 0.12152         | -2.83487  | -2.39124 |
| O    | -3.81438        | -2.83466  | -1.93025 |
| O    | -1.72559        | -0.98651  | -1.87288 |
| O    | -2.12921        | -2.83488  | -4.00904 |
| Mo   | 1.80689         | -2.83485  | -2.79903 |
| O    | 4.05726         | -2.83507  | -2.85222 |
| O    | 2.21031         | -0.98672  | -2.33388 |
| O    | 1.80668         | -2.83509  | -4.47003 |
| H    | -0.90843        | -10.81575 | 0.38206  |
| H    | 3.02731         | -10.81595 | -0.07892 |
| H    | 2.91159         | 1.45038   | 0.02540  |
| H    | -1.02415        | 1.45059   | 0.48638  |
| H    | 4.53685         | -3.66647  | -2.87170 |
| H    | 4.57965         | -5.69935  | -2.89263 |
| H    | 1.82364         | -0.19898  | -2.72318 |
| H    | 1.92968         | -9.16969  | -2.80984 |
| H    | -2.00622        | -9.16948  | -2.34885 |
| H    | -2.11226        | -0.19878  | -2.26219 |
| H    | 4.53740         | -2.00378  | -2.85542 |
| H    | 4.57910         | -7.36204  | -2.90890 |
| H    | -3.73640        | -8.00997  | -0.36622 |
| O    | -3.24277        | -8.42887  | 0.36224  |
| O    | -3.32145        | -0.97224  | 0.42248  |
| H    | -3.79736        | -1.41511  | -0.30397 |

Density-functional studies of hydrogen peroxide adsorption and dissociation on MoO<sub>3</sub>(100) and H<sub>0.33</sub>MoO<sub>3</sub>(100) surfaces.

G. H<sub>2</sub>O<sub>2</sub> + Mo<sub>6</sub>O<sub>23</sub>H<sub>10</sub> “TS1-Oxide” Transition State Structure.

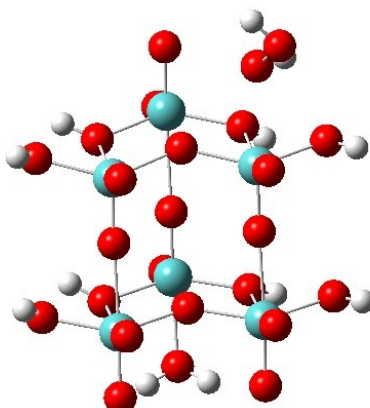

Total B3LYP Energy: -2294.23829964 Hartree BSSE correction: 0.005884851424 Hartree

| Atom | Coordinates / Å |          |          |
|------|-----------------|----------|----------|
|      | X               | Y        | Z        |
| O    | 3.37031         | 0.52952  | 5.58599  |
| O    | 1.23364         | 0.40967  | 3.71348  |
| O    | 3.47944         | 0.59294  | 1.89084  |
| O    | 2.75292         | 2.64592  | 3.76375  |
| O    | 1.23364         | 0.40968  | 0.01751  |
| Mo   | 2.87190         | 0.95372  | 0.04076  |
| Mo   | 2.87951         | 0.95625  | 3.73684  |
| O    | 3.51813         | 0.60579  | -1.80713 |
| O    | 2.83158         | 2.64845  | 0.00144  |
| O    | -0.48051        | -0.22457 | -1.86391 |
| Mo   | -1.00437        | 0.16964  | -0.00898 |
| O    | -0.54415        | -0.24006 | 1.83901  |
| O    | -2.64986        | -0.37680 | -0.03233 |
| O    | -1.11643        | 1.87287  | -0.04611 |
| Mo   | -1.00437        | 0.16963  | 3.68699  |
| O    | -0.54765        | -0.23264 | 5.55638  |
| O    | -2.64985        | -0.37681 | 3.66364  |
| O    | -1.14528        | 1.86977  | 3.73188  |
| O    | 3.86431         | -1.16744 | 0.02855  |
| Mo   | 4.42507         | -1.54081 | 1.87804  |
| O    | -0.21182        | -2.02350 | -0.02409 |
| O    | 1.89389         | -1.88676 | 1.84728  |
| O    | 6.04315         | -1.00817 | 1.90094  |
| O    | 3.88263         | -1.16082 | 3.72481  |
| O    | 4.55082         | -3.23837 | 1.90712  |
| Mo   | 0.24840         | -2.43320 | 1.82393  |
| O    | -1.98961        | -2.67323 | 1.79744  |

Density-functional studies of hydrogen peroxide adsorption and dissociation on MoO<sub>3</sub>(100) and H<sub>0.33</sub>MoO<sub>3</sub>(100) surfaces.

| Atom | Coordinates / Å |          |          |
|------|-----------------|----------|----------|
|      | X               | Y        | Z        |
| O    | -0.21182        | -2.02350 | 3.67191  |
| O    | 0.40977         | -4.12610 | 1.86080  |
| H    | -0.73151        | 0.48301  | 6.17554  |
| H    | 3.13678         | 1.19953  | 6.24171  |
| H    | -2.39414        | -2.39119 | 0.95816  |
| H    | -0.38536        | -2.61714 | 4.41035  |
| H    | 3.53769         | -1.81703 | 4.34135  |
| H    | -2.44705        | -2.14249 | 2.47829  |
| H    | 3.60138         | 1.38186  | -2.37539 |
| H    | -0.25556        | 0.54003  | -2.40474 |
| H    | 4.32576         | -1.37882 | -0.79292 |
| H    | 0.29673         | -2.19621 | -0.82663 |
| O    | 5.38130         | 1.18979  | 3.89037  |
| H    | 5.54613         | 0.64420  | 4.67794  |
| O    | 5.84744         | 2.48836  | 4.32589  |
| H    | 6.52614         | 2.66242  | 3.65662  |

Density-functional studies of hydrogen peroxide adsorption and dissociation on MoO<sub>3</sub>(100) and H<sub>0.33</sub>MoO<sub>3</sub>(100) surfaces.

H. H<sub>2</sub>O<sub>2</sub> + Mo<sub>6</sub>O<sub>23</sub>H<sub>10</sub> “TS2-Oxide” Transition State Structure.

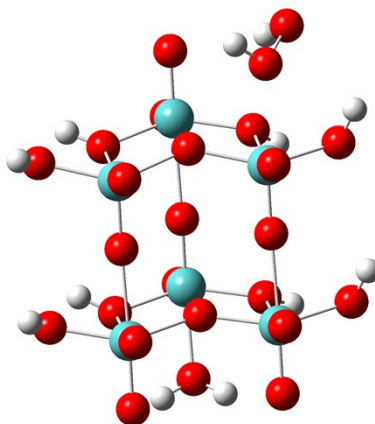

Total B3LYP Energy: -2294.2406737 Hartree BSSE correction: 0.006542648089 Hartree

| Atom | Coordinates / Å |          |          |
|------|-----------------|----------|----------|
|      | X               | Y        | Z        |
| O    | 3.26855         | 0.49573  | 5.58451  |
| O    | 1.23364         | 0.40967  | 3.71348  |
| O    | 3.48786         | 0.59574  | 1.89096  |
| O    | 2.81344         | 2.65212  | 3.69012  |
| O    | 1.23364         | 0.40968  | 0.01751  |
| Mo   | 2.86955         | 0.95294  | 0.04073  |
| Mo   | 2.87917         | 0.95613  | 3.73683  |
| O    | 3.51867         | 0.60597  | -1.80713 |
| O    | 2.83152         | 2.64772  | 0.00514  |
| O    | -0.47127        | -0.23779 | -1.86086 |
| Mo   | -1.00437        | 0.16964  | -0.00898 |
| O    | -0.54415        | -0.24006 | 1.83901  |
| O    | -2.64986        | -0.37680 | -0.03233 |
| O    | -1.11716        | 1.87182  | -0.06298 |
| Mo   | -1.00437        | 0.16963  | 3.68699  |
| O    | -0.60213        | -0.17684 | 5.56229  |
| O    | -2.64985        | -0.37681 | 3.66364  |
| O    | -1.10812        | 1.87229  | 3.62830  |
| O    | 3.81348         | -1.18581 | 0.02781  |
| Mo   | 4.33945         | -1.57174 | 1.87679  |
| O    | -0.21182        | -2.02350 | -0.02409 |
| O    | 1.89389         | -1.88676 | 1.84728  |
| O    | 5.96812         | -1.03418 | 1.89986  |
| O    | 3.84727         | -1.17360 | 3.72430  |

Density-functional studies of hydrogen peroxide adsorption and dissociation on MoO<sub>3</sub>(100) and H<sub>0.33</sub>MoO<sub>3</sub>(100) surfaces.

| Atom | Coordinates / Å |          |          |
|------|-----------------|----------|----------|
|      | X               | Y        | Z        |
| O    | 4.47159         | -3.26764 | 1.90359  |
| Mo   | 0.24840         | -2.43320 | 1.82393  |
| O    | -1.98961        | -2.67323 | 1.79744  |
| O    | -0.21182        | -2.02350 | 3.67191  |
| O    | 0.40849         | -4.12543 | 1.86019  |
| H    | 0.08684         | 0.34739  | 5.98597  |
| H    | 4.01185         | 0.93901  | 6.01532  |
| H    | -2.38972        | -2.39276 | 0.95529  |
| H    | -0.43662        | -2.62674 | 4.38906  |
| H    | 3.46940         | -1.80130 | 4.35200  |
| H    | -2.44820        | -2.13595 | 2.47317  |
| H    | 3.60015         | 1.38071  | -2.37757 |
| H    | -0.32055        | 0.52666  | -2.42709 |
| H    | 4.26426         | -1.42338 | -0.79266 |
| H    | 0.26990         | -2.21967 | -0.83778 |
| O    | 5.32640         | 1.38058  | 3.90680  |
| H    | 5.85825         | 1.72699  | 3.17394  |
| O    | 6.23184         | 0.52666  | 4.62551  |
| H    | 6.08933         | -0.33139 | 4.18761  |



Density-functional studies of hydrogen peroxide adsorption and dissociation on MoO<sub>3</sub>(100) and H<sub>0.33</sub>MoO<sub>3</sub>(100) surfaces.

SECTION 4

A. HOOH + Mo<sub>6</sub>O<sub>23</sub>H<sub>10</sub> + 2H Hydrogen Bronze “HOOH1” Structure

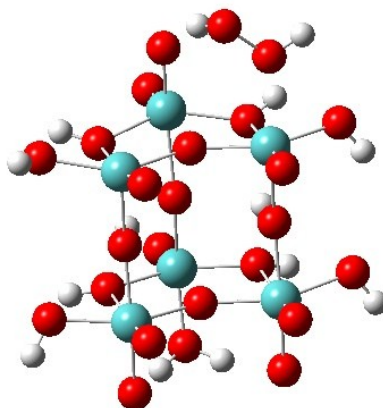

Total B3LYP Energy: -2295.27491653 Hartree B SSE correction: 0.006000678683 Hartree

| Atom | Coordinates / Å |         |          |
|------|-----------------|---------|----------|
|      | X               | Y       | Z        |
| O    | 0.08291         | 5.80887 | 3.73617  |
| O    | 0.37065         | 7.98047 | 5.58070  |
| O    | -1.88637        | 7.92301 | 3.60865  |
| Mo   | -0.10311        | 3.86863 | 3.72000  |
| O    | 0.18602         | 1.94025 | 3.73617  |
| O    | 0.48023         | 3.86863 | 1.85930  |
| O    | 0.37207         | 4.09597 | 5.64423  |
| O    | -1.79569        | 3.97313 | 3.66515  |
| O    | 0.08291         | 5.80887 | 0.01617  |
| O    | 0.36306         | 8.26535 | -1.86070 |
| O    | -1.85970        | 8.05409 | 0.19113  |
| Mo   | -0.10311        | 3.86863 | 0.00000  |
| Mo   | -0.20822        | 7.81274 | 0.00000  |
| O    | 0.18602         | 1.94025 | 0.01617  |
| Mo   | -0.20988        | 7.87483 | 3.72000  |
| O    | 0.38154         | 4.08937 | -1.90706 |
| O    | -1.79771        | 3.97996 | 0.02448  |
| O    | 2.52013         | 5.86430 | 1.87546  |
| O    | 2.41578         | 9.77979 | 1.84275  |
| O    | 4.39704         | 7.98792 | 1.84622  |
| Mo   | 2.80924         | 3.93672 | 1.85930  |
| O    | 2.62324         | 1.99568 | 1.87546  |
| O    | 0.37223         | 7.92081 | 1.85930  |
| O    | 2.22673         | 3.90565 | -0.00141 |
| O    | 2.22590         | 3.93672 | 3.72000  |

Density-functional studies of hydrogen peroxide adsorption and dissociation on MoO<sub>3</sub>(100) and H<sub>0.33</sub>MoO<sub>3</sub>(100) surfaces.

| Atom | Coordinates / Å |          |          |
|------|-----------------|----------|----------|
|      | X               | Y        | Z        |
| O    | 2.12527         | 7.71240  | -0.00141 |
| Mo   | 2.69934         | 8.05998  | 1.85930  |
| O    | 2.12576         | 7.69407  | 3.72000  |
| O    | 4.49773         | 3.82052  | 1.86018  |
| H    | 2.54031         | 8.02952  | 4.52420  |
| H    | 0.34936         | 7.16780  | 6.10652  |
| H    | 2.02354         | 1.71492  | 2.63348  |
| H    | 2.04568         | 1.70626  | 1.10582  |
| H    | 2.62626         | 3.62641  | 4.54173  |
| H    | 0.28097         | 3.27070  | 6.13433  |
| H    | 2.58209         | 7.97944  | -0.80876 |
| H    | -0.32004        | 8.47588  | -2.51129 |
| H    | 0.26133         | 3.27592  | -2.41046 |
| H    | 2.64921         | 3.74263  | -0.85350 |
| H    | 1.06142         | 5.90003  | 3.70545  |
| H    | 1.02054         | 5.87730  | 0.32229  |
| O    | 0.27225         | 9.98835  | 3.95922  |
| O    | 0.21432         | 10.96124 | 2.89628  |
| H    | 1.06826         | 10.74502 | 2.44168  |
| H    | 0.10100         | 10.48234 | 4.77595  |

Density-functional studies of hydrogen peroxide adsorption and dissociation on MoO<sub>3</sub>(100) and H<sub>0.33</sub>MoO<sub>3</sub>(100) surfaces.

**B. HOOH + Mo<sub>6</sub>O<sub>23</sub>H<sub>10</sub> + 2H Hydrogen Bronze “HOOH2” Structure**

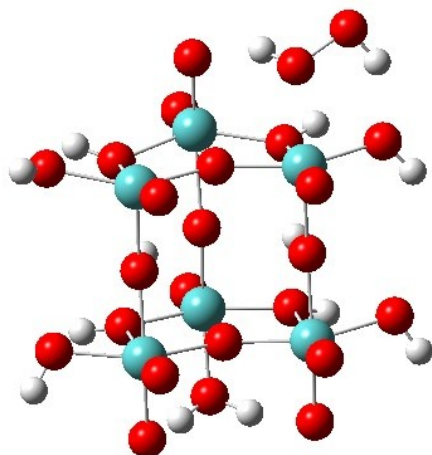

Total B3LYP Energy: -2295.28055853 Hartree BSSE correction: 0.006410875207 Hartree

| Atom | Coordinates / Å |         |          |
|------|-----------------|---------|----------|
|      | X               | Y       | Z        |
| O    | 0.08291         | 5.80887 | 3.73617  |
| O    | 0.36793         | 8.08228 | 5.58070  |
| O    | -1.88470        | 7.93744 | 3.62444  |
| Mo   | -0.10311        | 3.86863 | 3.72000  |
| O    | 0.18602         | 1.94025 | 3.73617  |
| O    | 0.48023         | 3.86863 | 1.85930  |
| O    | 0.37398         | 4.08938 | 5.64392  |
| O    | -1.79572        | 3.97347 | 3.66824  |
| O    | 0.08291         | 5.80887 | 0.01617  |
| O    | 0.36329         | 8.25675 | -1.86070 |
| O    | -1.85998        | 8.04501 | 0.19101  |
| Mo   | -0.10311        | 3.86863 | 0.00000  |
| Mo   | -0.20810        | 7.80796 | 0.00000  |
| O    | 0.18602         | 1.94025 | 0.01617  |
| Mo   | -0.21014        | 7.88461 | 3.72000  |
| O    | 0.37948         | 4.09323 | -1.90615 |
| O    | -1.79748        | 3.98207 | 0.02674  |
| O    | 2.52013         | 5.86430 | 1.87546  |
| O    | 2.41595         | 9.77350 | 1.84280  |
| O    | 4.39720         | 7.98253 | 1.85184  |
| Mo   | 2.80924         | 3.93672 | 1.85930  |
| O    | 2.62324         | 1.99568 | 1.87546  |
| O    | 0.37248         | 7.91144 | 1.85930  |
| O    | 2.22673         | 3.90565 | -0.00141 |
| O    | 2.22590         | 3.93672 | 3.72000  |

Density-functional studies of hydrogen peroxide adsorption and dissociation on MoO<sub>3</sub>(100) and H<sub>0.33</sub>MoO<sub>3</sub>(100) surfaces.

| Atom | Coordinates / Å |          |          |
|------|-----------------|----------|----------|
|      | X               | Y        | Z        |
| O    | 2.12541         | 7.70733  | -0.00141 |
| Mo   | 2.69943         | 8.05692  | 1.85930  |
| O    | 2.12537         | 7.70866  | 3.72000  |
| O    | 4.49759         | 3.82074  | 1.85990  |
| H    | 2.62591         | 7.91461  | 4.51766  |
| H    | 0.32873         | 7.34050  | 6.19885  |
| H    | 2.02242         | 1.71380  | 2.63219  |
| H    | 2.04832         | 1.70507  | 1.10460  |
| H    | 2.61698         | 3.60989  | 4.53993  |
| H    | 0.27660         | 3.26281  | 6.13074  |
| H    | 2.57115         | 7.99928  | -0.80665 |
| H    | -0.31680        | 8.47092  | -2.51351 |
| H    | 0.26346         | 3.28095  | -2.41246 |
| H    | 2.65280         | 3.74853  | -0.85289 |
| H    | 1.05982         | 5.89877  | 3.67715  |
| H    | 1.02383         | 5.87684  | 0.31302  |
| O    | 0.31101         | 10.00955 | 3.74414  |
| H    | 1.07215         | 10.21603 | 3.14979  |
| O    | 0.68082         | 10.61523 | 5.01123  |
| H    | 0.63383         | 9.81363  | 5.59267  |

Density-functional studies of hydrogen peroxide adsorption and dissociation on MoO<sub>3</sub>(100) and H<sub>0.33</sub>MoO<sub>3</sub>(100) surfaces.

C. HOOH + Mo<sub>6</sub>O<sub>23</sub>H<sub>10</sub> + 2H Hydrogen Bronze “HOO-H1” Structure

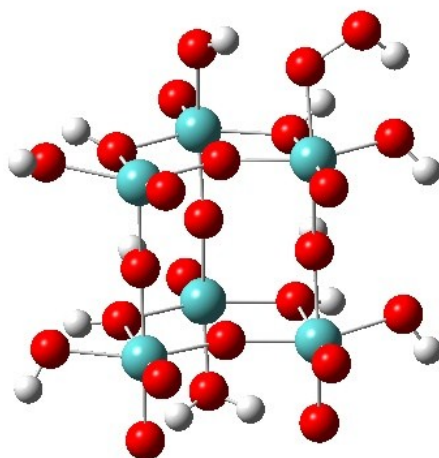

Total B3LYP Energy: -2295.27758605 Hartree BSSE correction: 0.007085973133 Hartree

| Atom | Coordinates / Å |         |          |
|------|-----------------|---------|----------|
|      | X               | Y       | Z        |
| O    | 0.08291         | 5.80887 | 3.73617  |
| O    | 0.36958         | 8.02031 | 5.58070  |
| O    | -1.89767        | 7.90133 | 3.70447  |
| Mo   | -0.10311        | 3.86863 | 3.72000  |
| O    | 0.18602         | 1.94025 | 3.73617  |
| O    | 0.48023         | 3.86863 | 1.85930  |
| O    | 0.37360         | 4.09492 | 5.64207  |
| O    | -1.79423        | 3.96021 | 3.65019  |
| O    | 0.08291         | 5.80887 | 0.01617  |
| O    | 0.36307         | 8.26486 | -1.86070 |
| O    | -1.83435        | 8.17447 | 0.23986  |
| Mo   | -0.10311        | 3.86863 | 0.00000  |
| Mo   | -0.20855        | 7.82482 | 0.00000  |
| O    | 0.18602         | 1.94025 | 0.01617  |
| Mo   | -0.21180        | 7.94698 | 3.72000  |
| O    | 0.39525         | 4.10319 | -1.90258 |
| O    | -1.79576        | 3.98294 | 0.03213  |
| O    | 2.52013         | 5.86430 | 1.87546  |
| O    | 2.41813         | 9.69170 | 1.84348  |
| O    | 4.39052         | 7.88808 | 1.77774  |
| Mo   | 2.80924         | 3.93672 | 1.85930  |
| O    | 2.62324         | 1.99568 | 1.87546  |
| O    | 0.37249         | 7.91117 | 1.85930  |
| O    | 2.22673         | 3.90565 | -0.00141 |

Density-functional studies of hydrogen peroxide adsorption and dissociation on MoO<sub>3</sub>(100) and H<sub>0.33</sub>MoO<sub>3</sub>(100) surfaces.

| Atom | Coordinates / Å |          |          |
|------|-----------------|----------|----------|
|      | X               | Y        | Z        |
| O    | 2.22590         | 3.93672  | 3.72000  |
| O    | 2.12578         | 7.69351  | -0.00141 |
| Mo   | 2.70640         | 7.79521  | 1.85930  |
| O    | 2.12591         | 7.68850  | 3.72000  |
| O    | 4.49679         | 3.87779  | 1.84029  |
| H    | 2.49344         | 8.18438  | 4.46360  |
| H    | 0.08941         | 7.32527  | 6.19203  |
| H    | 2.03073         | 1.71536  | 2.63978  |
| H    | 2.04648         | 1.70374  | 1.10676  |
| H    | 2.64632         | 3.70033  | 4.55666  |
| H    | 0.31319         | 3.26484  | 6.12866  |
| H    | 2.56407         | 8.08222  | -0.76992 |
| H    | -0.30710        | 8.54932  | -2.49668 |
| H    | 0.29623         | 3.29374  | -2.41687 |
| H    | 2.65504         | 3.77054  | -0.85618 |
| H    | 1.04025         | 5.90354  | 3.91405  |
| H    | 1.06281         | 5.88690  | 0.05180  |
| O    | 0.24810         | 9.84832  | 3.71347  |
| H    | 1.65160         | 10.09543 | 2.29385  |
| O    | -0.01778        | 10.62551 | 4.88727  |
| H    | 0.09397         | 9.95697  | 5.59669  |

Density-functional studies of hydrogen peroxide adsorption and dissociation on MoO<sub>3</sub>(100) and H<sub>0.33</sub>MoO<sub>3</sub>(100) surfaces.

**D. HOOH + Mo<sub>6</sub>O<sub>23</sub>H<sub>10</sub> + 2H Hydrogen Bronze “HOO-H<sub>2</sub>” Structure**

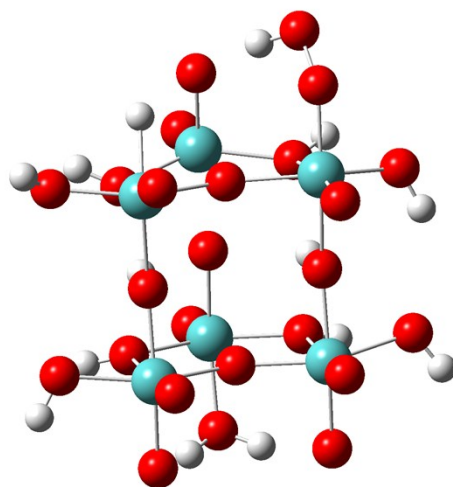

Total B3LYP Energy: -2295.24634195 Hartree BSSE correction: 0.008059861099 Hartree

| Atom | Coordinates / Å |         |          |
|------|-----------------|---------|----------|
|      | X               | Y       | Z        |
| O    | 0.08291         | 5.80887 | 3.73617  |
| O    | 0.37846         | 7.68713 | 5.58071  |
| O    | -1.91871        | 7.69760 | 3.77261  |
| Mo   | -0.10311        | 3.86863 | 3.72000  |
| O    | 0.18602         | 1.94025 | 3.73617  |
| O    | 0.48023         | 3.86863 | 1.85930  |
| O    | 0.36589         | 4.15941 | 5.64216  |
| O    | -1.79452        | 3.96952 | 3.66581  |
| O    | 0.08291         | 5.80887 | 0.01617  |
| O    | 0.36774         | 8.08980 | -1.86070 |
| O    | -1.81308        | 8.38969 | -0.06846 |
| Mo   | -0.10311        | 3.86863 | 0.00000  |
| Mo   | -0.21697        | 7.86551 | -0.04647 |
| O    | 0.18602         | 1.94025 | 0.01617  |
| Mo   | -0.24702        | 7.89043 | 3.76723  |
| O    | 0.38183         | 4.09681 | -1.90635 |
| O    | -1.79697        | 3.97945 | 0.03530  |
| O    | 2.52013         | 5.86430 | 1.87546  |
| O    | 2.40623         | 9.69193 | 1.83184  |
| O    | 4.48250         | 8.00200 | 1.88453  |
| Mo   | 2.80924         | 3.93672 | 1.85930  |
| O    | 2.62324         | 1.99568 | 1.87546  |

Density-functional studies of hydrogen peroxide adsorption and dissociation on MoO<sub>3</sub>(100) and H<sub>0.33</sub>MoO<sub>3</sub>(100) surfaces.

| Atom | Coordinates / Å |          |          |
|------|-----------------|----------|----------|
|      | X               | Y        | Z        |
| O    | 0.32928         | 7.83325  | 1.85278  |
| O    | 2.22673         | 3.90565  | -0.00141 |
| O    | 2.22590         | 3.93672  | 3.72000  |
| O    | 2.14928         | 7.53300  | 0.01438  |
| Mo   | 2.78844         | 7.97940  | 1.86402  |
| O    | 2.17629         | 7.67126  | 3.73174  |
| O    | 4.49693         | 3.82356  | 1.85379  |
| H    | 2.60701         | 8.00225  | 4.53021  |
| H    | 0.27670         | 6.79989  | 5.96590  |
| H    | 2.03548         | 1.71051  | 2.63920  |
| H    | 2.03829         | 1.70687  | 1.11050  |
| H    | 2.64666         | 3.66440  | 4.54506  |
| H    | 0.23981         | 3.37047  | 6.18198  |
| H    | 2.57251         | 7.90546  | -0.77094 |
| H    | -0.16547        | 8.54222  | -2.52815 |
| H    | 0.25157         | 3.29060  | -2.41891 |
| H    | 2.65337         | 3.71293  | -0.84556 |
| H    | 1.06138         | 5.90370  | 3.70673  |
| H    | 1.06128         | 5.90309  | 0.10807  |
| O    | -0.12761        | 9.76887  | 3.84793  |
| H    | 1.44566         | 10.40706 | 2.99585  |
| O    | 0.86456         | 10.72723 | 3.74172  |
| H    | 0.44874         | 9.39327  | 0.15496  |



Density-functional studies of hydrogen peroxide adsorption and dissociation on MoO<sub>3</sub>(100) and H<sub>0.33</sub>MoO<sub>3</sub>(100) surfaces.

**E. HOOH + Mo<sub>6</sub>O<sub>23</sub>H<sub>10</sub> + 2H Hydrogen Bronze “HO-OH<sub>2</sub>” Structure**

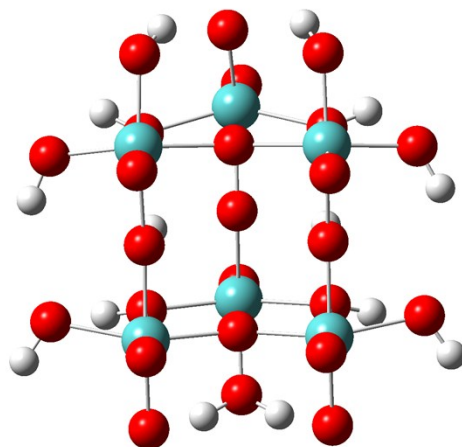

Total B3LYP Energy: -2295.40272383 Hartree BSSE correction: 0.010196094226 Hartree

| Atom | Coordinates / Å |         |          |
|------|-----------------|---------|----------|
|      | X               | Y       | Z        |
| O    | 0.08291         | 5.80887 | 3.73617  |
| O    | 0.37858         | 7.68274 | 5.58071  |
| O    | -1.89302        | 7.72811 | 3.83127  |
| Mo   | -0.10311        | 3.86863 | 3.72000  |
| O    | 0.18602         | 1.94025 | 3.73617  |
| O    | 0.48023         | 3.86863 | 1.85930  |
| O    | 0.36271         | 4.14537 | 5.64505  |
| O    | -1.79452        | 3.96618 | 3.66868  |
| O    | 0.08291         | 5.80887 | 0.01617  |
| O    | 0.37997         | 7.63066 | -1.86070 |
| O    | -1.83150        | 7.85475 | -0.07001 |
| Mo   | -0.10311        | 3.86863 | 0.00000  |
| Mo   | -0.15159        | 7.93224 | -0.05430 |
| O    | 0.18602         | 1.94025 | 0.01617  |
| Mo   | -0.22543        | 7.89990 | 3.76323  |
| O    | 0.37652         | 4.17179 | -1.91993 |
| O    | -1.79517        | 3.95570 | 0.02347  |
| O    | 2.52013         | 5.86430 | 1.87546  |
| O    | 2.43829         | 9.66597 | 1.77593  |
| O    | 4.52566         | 7.98546 | 1.99712  |
| Mo   | 2.80924         | 3.93672 | 1.85930  |
| O    | 2.62324         | 1.99568 | 1.87546  |
| O    | 0.33309         | 7.79831 | 1.87487  |
| O    | 2.22673         | 3.90565 | -0.00141 |
| O    | 2.22590         | 3.93672 | 3.72000  |

Density-functional studies of hydrogen peroxide adsorption and dissociation on MoO<sub>3</sub>(100) and H<sub>0.33</sub>MoO<sub>3</sub>(100) surfaces.

| Atom | Coordinates / Å |          |          |
|------|-----------------|----------|----------|
|      | X               | Y        | Z        |
| O    | 2.21476         | 7.59696  | 0.02117  |
| Mo   | 2.83477         | 7.96048  | 1.90046  |
| O    | 2.16223         | 7.65580  | 3.74221  |
| O    | 4.49693         | 3.82368  | 1.85202  |
| H    | 2.62174         | 7.86102  | 4.56574  |
| H    | 0.15013         | 6.85337  | 6.03276  |
| H    | 2.03108         | 1.71229  | 2.63769  |
| H    | 2.03808         | 1.70747  | 1.10942  |
| H    | 2.63926         | 3.65134  | 4.54458  |
| H    | 0.24045         | 3.34690  | 6.17167  |
| H    | 2.66625         | 7.91971  | -0.76869 |
| H    | 0.25760         | 6.74669  | -2.24962 |
| H    | 0.21563         | 3.39955  | -2.47475 |
| H    | 2.66302         | 3.70995  | -0.83991 |
| H    | 1.05987         | 5.89970  | 3.68859  |
| H    | 1.04941         | 5.89306  | 0.17665  |
| O    | 0.03268         | 9.75840  | 3.72810  |
| O    | 0.23019         | 9.75792  | 0.01097  |
| H    | 1.04186         | 10.07247 | 0.46346  |
| H    | 0.83596         | 10.16352 | 3.35916  |

Density-functional studies of hydrogen peroxide adsorption and dissociation on MoO<sub>3</sub>(100) and H<sub>0.33</sub>MoO<sub>3</sub>(100) surfaces.

**F. HOOH + Mo<sub>6</sub>O<sub>23</sub>H<sub>10</sub> + 2H Hydrogen Bronze “HO-OH3” Structure**

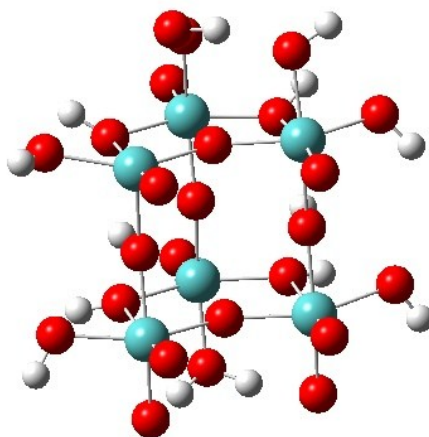

Total B3LYP Energy: -2295.27824496 Hartree BSSE correction: 0.008040614696 Hartree

| Atom | Coordinates / Å |         |          |
|------|-----------------|---------|----------|
|      | X               | Y       | Z        |
| O    | 0.08291         | 5.80887 | 3.73617  |
| O    | 0.36960         | 8.01987 | 5.58070  |
| O    | -1.88559        | 7.75749 | 3.66890  |
| Mo   | -0.10311        | 3.86863 | 3.72000  |
| O    | 0.18602         | 1.94025 | 3.73617  |
| O    | 0.48023         | 3.86863 | 1.85930  |
| O    | 0.36965         | 4.09121 | 5.64341  |
| O    | -1.79384        | 3.95984 | 3.64276  |
| O    | 0.08291         | 5.80887 | 0.01617  |
| O    | 0.36229         | 8.29414 | -1.86070 |
| O    | -1.87338        | 7.99354 | 0.10170  |
| Mo   | -0.10311        | 3.86863 | 0.00000  |
| Mo   | -0.20899        | 7.84146 | 0.00000  |
| O    | 0.18602         | 1.94025 | 0.01617  |
| Mo   | -0.21127        | 7.92723 | 3.72000  |
| O    | 0.37956         | 4.10325 | -1.90755 |
| O    | -1.79494        | 3.98272 | 0.06153  |
| O    | 2.52013         | 5.86430 | 1.87546  |
| O    | 2.41765         | 9.70963 | 1.84333  |
| O    | 4.39098         | 7.92068 | 1.89144  |
| Mo   | 2.80924         | 3.93672 | 1.85930  |
| O    | 2.62324         | 1.99568 | 1.87546  |
| O    | 0.37295         | 7.89386 | 1.85930  |
| O    | 2.22673         | 3.90565 | -0.00141 |
| O    | 2.22590         | 3.93672 | 3.72000  |

Density-functional studies of hydrogen peroxide adsorption and dissociation on MoO<sub>3</sub>(100) and H<sub>0.33</sub>MoO<sub>3</sub>(100) surfaces.

| Atom | Coordinates / Å |          |          |
|------|-----------------|----------|----------|
|      | X               | Y        | Z        |
| O    | 2.12430         | 7.74876  | -0.00141 |
| Mo   | 2.70733         | 7.76054  | 1.85930  |
| O    | 2.12700         | 7.64747  | 3.72000  |
| O    | 4.49710         | 3.87830  | 1.85178  |
| H    | 2.47351         | 8.17757  | 4.45068  |
| H    | 0.08142         | 7.30319  | 6.16397  |
| H    | 2.03210         | 1.71835  | 2.64323  |
| H    | 2.03821         | 1.70490  | 1.11075  |
| H    | 2.65652         | 3.73341  | 4.55989  |
| H    | 0.30816         | 3.25969  | 6.12739  |
| H    | 2.50470         | 8.27222  | -0.72042 |
| H    | -0.31227        | 8.40892  | -2.54226 |
| H    | 0.30911         | 3.28804  | -2.41713 |
| H    | 2.66241         | 3.71194  | -0.84062 |
| H    | 1.04355         | 5.89887  | 3.90307  |
| H    | 1.04884         | 5.89629  | -0.13985 |
| O    | 0.08609         | 9.87548  | 3.68325  |
| O    | 1.24672         | 10.33066 | 1.35756  |
| H    | 0.70760         | 10.37376 | 2.19510  |
| H    | 0.11588         | 10.32124 | 4.53889  |

Density-functional studies of hydrogen peroxide adsorption and dissociation on MoO<sub>3</sub>(100) and H<sub>0.33</sub>MoO<sub>3</sub>(100) surfaces.

**G. HOOH + Mo<sub>6</sub>O<sub>23</sub>H<sub>10</sub> + 2H Hydrogen Bronze “HO-OH4” Structure**

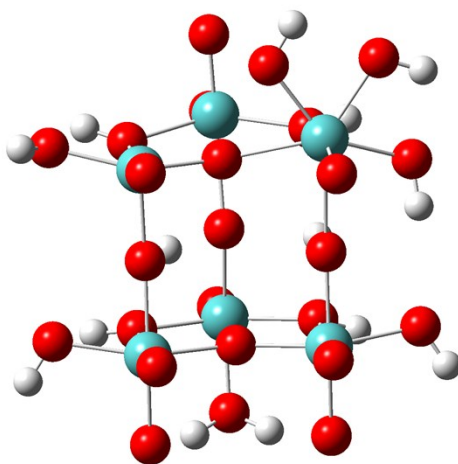

Total B3LYP Energy: -2295.31661206 Hartree BSSE correction: 0.007248789717 Hartree

| Atom | Coordinates / Å |         |          |
|------|-----------------|---------|----------|
|      | X               | Y       | Z        |
| O    | 0.08291         | 5.80887 | 3.73617  |
| O    | 0.38106         | 7.58974 | 5.58071  |
| O    | -1.72676        | 7.81523 | 3.84417  |
| Mo   | -0.10311        | 3.86863 | 3.72000  |
| O    | 0.18602         | 1.94025 | 3.73617  |
| O    | 0.48023         | 3.86863 | 1.85930  |
| O    | 0.34746         | 4.09223 | 5.64854  |
| O    | -1.79535        | 3.94485 | 3.64899  |
| O    | 0.08291         | 5.80887 | 0.01617  |
| O    | 0.36459         | 8.20766 | -1.86070 |
| O    | -1.75266        | 8.03690 | -0.08142 |
| Mo   | -0.10311        | 3.86863 | 0.00000  |
| Mo   | -0.09390        | 7.75880 | -0.04078 |
| O    | 0.18602         | 1.94025 | 0.01617  |
| Mo   | -0.10636        | 8.22033 | 3.76544  |
| O    | 0.36579         | 4.15612 | -1.90217 |
| O    | -1.79758        | 3.98974 | 0.01910  |
| O    | 2.52013         | 5.86430 | 1.87546  |
| O    | 2.75345         | 9.88903 | 1.70980  |
| O    | 4.54392         | 7.90316 | 1.82860  |
| Mo   | 2.80924         | 3.93672 | 1.85930  |
| O    | 2.62324         | 1.99568 | 1.87546  |
| O    | 0.49085         | 7.76130 | 1.69166  |

Density-functional studies of hydrogen peroxide adsorption and dissociation on MoO<sub>3</sub>(100) and H<sub>0.33</sub>MoO<sub>3</sub>(100) surfaces.

| Atom | Coordinates / Å |          |          |
|------|-----------------|----------|----------|
|      | X               | Y        | Z        |
| O    | 2.22673         | 3.90565  | -0.00141 |
| O    | 2.22590         | 3.93672  | 3.72000  |
| O    | 2.14297         | 7.85935  | -0.09027 |
| Mo   | 2.86950         | 8.17786  | 1.80139  |
| O    | 2.21479         | 7.95413  | 3.64754  |
| O    | 4.49767         | 3.81712  | 1.85865  |
| H    | 2.69319         | 8.00181  | 4.48380  |
| H    | 0.11460         | 6.65740  | 5.67023  |
| H    | 2.01176         | 1.71665  | 2.62681  |
| H    | 2.07236         | 1.69070  | 1.09905  |
| H    | 2.61735         | 3.59808  | 4.53536  |
| H    | 0.21893         | 3.28161  | 6.15431  |
| H    | 2.59748         | 8.09500  | -0.90865 |
| H    | -0.34909        | 8.36358  | -2.49702 |
| H    | 0.20868         | 3.37754  | -2.44898 |
| H    | 2.67096         | 3.77961  | -0.84792 |
| H    | 1.05058         | 5.92126  | 3.65722  |
| H    | 0.92920         | 5.83710  | 0.55814  |
| O    | 0.06817         | 9.80462  | 4.94093  |
| O    | -0.21048        | 9.82265  | 2.65196  |
| H    | -0.11169        | 10.62775 | 3.18132  |
| H    | 0.16100         | 9.47994  | 5.84878  |

Density-functional studies of hydrogen peroxide adsorption and dissociation on MoO<sub>3</sub>(100) and H<sub>0.33</sub>MoO<sub>3</sub>(100) surfaces.

### H. HOOH + Mo<sub>6</sub>O<sub>23</sub>H<sub>10</sub> + 2H Hydrogen Bronze “HO-OH5” Structure

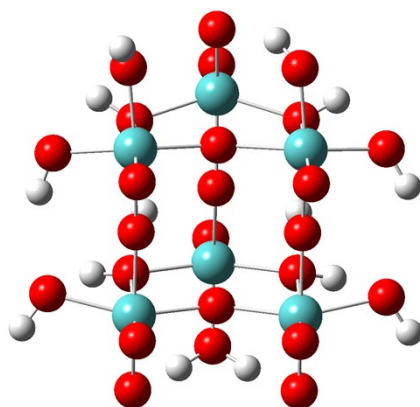

Total B3LYP Energy: -2295.39602049 Hartree BSSE correction: 0.0095389515 Hartree

| Atom | Coordinates / Å |         |          |
|------|-----------------|---------|----------|
|      | X               | Y       | Z        |
| O    | 0.08291         | 5.80887 | 3.73617  |
| O    | 0.37744         | 7.72543 | 5.58071  |
| O    | -1.84254        | 7.79997 | 3.83704  |
| Mo   | -0.10311        | 3.86863 | 3.72000  |
| O    | 0.18602         | 1.94025 | 3.73617  |
| O    | 0.48023         | 3.86863 | 1.85930  |
| O    | 0.35298         | 4.14826 | 5.64676  |
| O    | -1.79509        | 3.96908 | 3.66492  |
| O    | 0.08291         | 5.80887 | 0.01617  |
| O    | 0.38137         | 7.57833 | -1.86070 |
| O    | -1.84171        | 7.82562 | -0.05365 |
| Mo   | -0.10311        | 3.86863 | 0.00000  |
| Mo   | -0.16468        | 7.91938 | -0.04567 |
| O    | 0.18602         | 1.94025 | 0.01617  |
| Mo   | -0.16720        | 7.91984 | 3.76200  |
| O    | 0.37690         | 4.18119 | -1.92010 |
| O    | -1.79618        | 3.95718 | 0.01969  |
| O    | 2.52013         | 5.86430 | 1.87546  |
| O    | 2.48150         | 9.71619 | 1.82372  |
| O    | 4.52841         | 8.00012 | 1.91034  |
| Mo   | 2.80924         | 3.93672 | 1.85930  |
| O    | 2.62324         | 1.99568 | 1.87546  |
| O    | 0.37017         | 7.80019 | 1.83011  |
| O    | 2.22673         | 3.90565 | -0.00141 |
| O    | 2.22590         | 3.93672 | 3.72000  |

Density-functional studies of hydrogen peroxide adsorption and dissociation on MoO<sub>3</sub>(100) and H<sub>0.33</sub>MoO<sub>3</sub>(100) surfaces.

| Atom | Coordinates / Å |          |          |
|------|-----------------|----------|----------|
|      | X               | Y        | Z        |
| O    | 2.20015         | 7.60770  | 0.01728  |
| Mo   | 2.83374         | 8.01059  | 1.87031  |
| O    | 2.21162         | 7.64571  | 3.73689  |
| O    | 4.49737         | 3.81895  | 1.85530  |
| H    | 2.66616         | 7.93823  | 4.53619  |
| H    | 0.12663         | 6.92381  | 6.06922  |
| H    | 2.03371         | 1.71063  | 2.63733  |
| H    | 2.03920         | 1.70731  | 1.10948  |
| H    | 2.64423         | 3.64586  | 4.53963  |
| H    | 0.24019         | 3.34619  | 6.16986  |
| H    | 2.62072         | 7.96908  | -0.77372 |
| H    | 0.35482         | 6.64760  | -2.14972 |
| H    | 0.20918         | 3.41655  | -2.48312 |
| H    | 2.66223         | 3.70175  | -0.83793 |
| H    | 1.06268         | 5.88540  | 3.67818  |
| H    | 1.03951         | 5.89310  | 0.23070  |
| O    | 0.14777         | 9.75720  | 3.61113  |
| O    | 0.13723         | 9.76495  | -0.22474 |
| H    | -0.49404        | 10.47465 | -0.39589 |
| H    | 0.91621         | 10.10659 | 3.11388  |



Density-functional studies of hydrogen peroxide adsorption and dissociation on MoO<sub>3</sub>(100) and H<sub>0.33</sub>MoO<sub>3</sub>(100) surfaces.

I. HOOH + Mo<sub>6</sub>O<sub>23</sub>H<sub>10</sub> + 2H Hydrogen Bronze “TS1” Transition State Structure

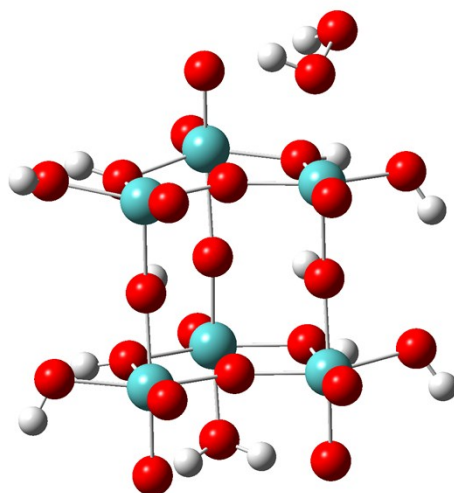

Total B3LYP Energy: -2295.2607711 Hartree BSSE correction: 0.006482805682 Hartree

| Atom | Coordinates / Å |         |          |
|------|-----------------|---------|----------|
|      | X               | Y       | Z        |
| O    | 0.08291         | 5.80887 | 3.73617  |
| O    | 0.37431         | 7.84281 | 5.58071  |
| O    | -1.88365        | 7.95997 | 3.60300  |
| Mo   | -0.10311        | 3.86863 | 3.72000  |
| O    | 0.18602         | 1.94025 | 3.73617  |
| O    | 0.48023         | 3.86863 | 1.85930  |
| O    | 0.37385         | 4.10428 | 5.64246  |
| O    | -1.79598        | 3.97239 | 3.67683  |
| O    | 0.08291         | 5.80887 | 0.01617  |
| O    | 0.36315         | 8.26190 | -1.86070 |
| O    | -1.84764        | 8.12643 | 0.21462  |
| Mo   | -0.10311        | 3.86863 | 0.00000  |
| Mo   | -0.20832        | 7.81627 | 0.00000  |
| O    | 0.18602         | 1.94025 | 0.01617  |
| Mo   | -0.20962        | 7.86519 | 3.72000  |
| O    | 0.37913         | 4.09016 | -1.90636 |
| O    | -1.79774        | 3.97924 | 0.02644  |
| O    | 2.52013         | 5.86430 | 1.87546  |
| O    | 2.41490         | 9.81288 | 1.84247  |
| O    | 4.39541         | 8.00766 | 1.86504  |
| Mo   | 2.80924         | 3.93672 | 1.85930  |
| O    | 2.62324         | 1.99568 | 1.87546  |

Density-functional studies of hydrogen peroxide adsorption and dissociation on MoO<sub>3</sub>(100) and H<sub>0.33</sub>MoO<sub>3</sub>(100) surfaces.

| Atom | Coordinates / Å |          |          |
|------|-----------------|----------|----------|
|      | X               | Y        | Z        |
| O    | 0.37247         | 7.91204  | 1.85930  |
| O    | 2.22673         | 3.90565  | -0.00141 |
| O    | 2.22590         | 3.93672  | 3.72000  |
| O    | 2.12462         | 7.73702  | -0.00141 |
| Mo   | 2.69827         | 8.10019  | 1.85930  |
| O    | 2.12176         | 7.84415  | 3.72000  |
| O    | 4.49765         | 3.81902  | 1.85655  |
| H    | 2.60525         | 7.72612  | 4.54504  |
| H    | 0.26851         | 7.00953  | 6.06465  |
| H    | 2.02481         | 1.71117  | 2.63229  |
| H    | 2.04776         | 1.70567  | 1.10461  |
| H    | 2.60808         | 3.60356  | 4.54162  |
| H    | 0.25345         | 3.29087  | 6.14616  |
| H    | 2.56639         | 8.00412  | -0.81718 |
| H    | -0.31484        | 8.47857  | -2.51453 |
| H    | 0.25988         | 3.27708  | -2.41065 |
| H    | 2.65317         | 3.75522  | -0.85392 |
| H    | 1.04695         | 5.88618  | 3.56084  |
| H    | 1.01385         | 5.87642  | 0.34324  |
| O    | 0.10988         | 10.10795 | 3.72424  |
| H    | 0.13029         | 10.52716 | 2.84732  |
| O    | 1.20721         | 10.72004 | 4.42298  |
| H    | 1.97423         | 10.38170 | 3.92064  |

Density-functional studies of hydrogen peroxide adsorption and dissociation on MoO<sub>3</sub>(100) and H<sub>0.33</sub>MoO<sub>3</sub>(100) surfaces.

**J. HOOH + Mo<sub>6</sub>O<sub>23</sub>H<sub>10</sub> + 2H Hydrogen Bronze “TS2” Transition State Structure**

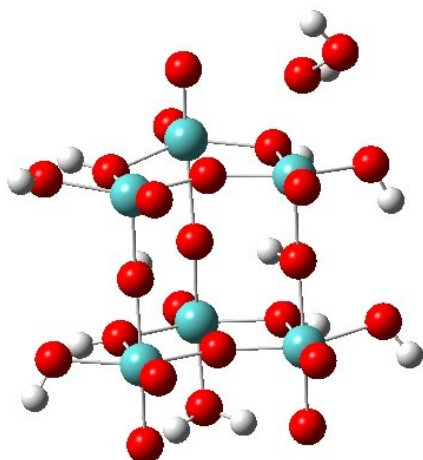

Total B3LYP Energy: -2295.2623555 Hartree BSSE correction: 0.005478846939 Hartree

| Atom | Coordinates / Å |         |          |
|------|-----------------|---------|----------|
|      | X               | Y       | Z        |
| O    | 0.08291         | 5.80887 | 3.73617  |
| O    | 0.37638         | 7.76532 | 5.58071  |
| O    | -1.87675        | 8.01586 | 3.56203  |
| Mo   | -0.10311        | 3.86863 | 3.72000  |
| O    | 0.18602         | 1.94025 | 3.73617  |
| O    | 0.48023         | 3.86863 | 1.85930  |
| O    | 0.37129         | 4.12188 | 5.64307  |
| O    | -1.79742        | 3.95890 | 3.69251  |
| O    | 0.08291         | 5.80887 | 0.01617  |
| O    | 0.36319         | 8.26038 | -1.86070 |
| O    | -1.85532        | 8.10013 | 0.19090  |
| Mo   | -0.10311        | 3.86863 | 0.00000  |
| Mo   | -0.20849        | 7.82277 | 0.00000  |
| O    | 0.18602         | 1.94025 | 0.01617  |
| Mo   | -0.20922        | 7.85019 | 3.72000  |
| O    | 0.36763         | 4.08778 | -1.90886 |
| O    | -1.79766        | 3.98206 | 0.03754  |
| O    | 2.52013         | 5.86430 | 1.87546  |
| O    | 2.41301         | 9.88378 | 1.84188  |
| O    | 4.39402         | 8.06965 | 1.86639  |
| Mo   | 2.80924         | 3.93672 | 1.85930  |
| O    | 2.62324         | 1.99568 | 1.87546  |
| O    | 0.37208         | 7.92663 | 1.85930  |
| O    | 2.22673         | 3.90565 | -0.00141 |
| O    | 2.22590         | 3.93672 | 3.72000  |

Density-functional studies of hydrogen peroxide adsorption and dissociation on MoO<sub>3</sub>(100) and H<sub>0.33</sub>MoO<sub>3</sub>(100) surfaces.

| Atom | Coordinates / Å |          |          |
|------|-----------------|----------|----------|
|      | X               | Y        | Z        |
| O    | 2.12362         | 7.77443  | -0.00141 |
| Mo   | 2.69582         | 8.19233  | 1.85930  |
| O    | 2.11941         | 7.93227  | 3.72000  |
| O    | 4.49791         | 3.81456  | 1.84542  |
| H    | 2.61349         | 7.48365  | 4.41490  |
| H    | 0.36875         | 6.88624  | 5.98938  |
| H    | 2.02727         | 1.70888  | 2.63202  |
| H    | 2.04868         | 1.70515  | 1.10491  |
| H    | 2.59259         | 3.58465  | 4.54050  |
| H    | 0.20779         | 3.32699  | 6.16401  |
| H    | 2.55853         | 8.04651  | -0.81888 |
| H    | -0.31719        | 8.44494  | -2.52181 |
| H    | 0.26549         | 3.26841  | -2.40655 |
| H    | 2.66122         | 3.73767  | -0.84618 |
| H    | 0.95578         | 5.86865  | 3.27618  |
| H    | 1.02925         | 5.88436  | 0.29475  |
| O    | 0.30160         | 10.00651 | 4.14616  |
| H    | 0.97956         | 9.92373  | 4.84333  |
| O    | -0.75732        | 10.71883 | 4.83604  |
| H    | -0.86344        | 11.47758 | 4.23966  |

Density-functional studies of hydrogen peroxide adsorption and dissociation on MoO<sub>3</sub>(100) and H<sub>0.33</sub>MoO<sub>3</sub>(100) surfaces.

**K. HOOH + Mo<sub>6</sub>O<sub>23</sub>H<sub>10</sub> + 2H Hydrogen Bronze “TS3” Transition State Structure**

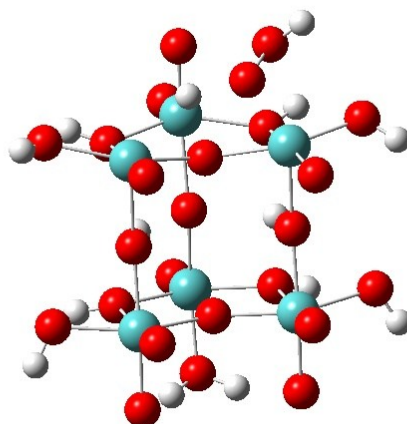

Total B3LYP Energy: -2295.18082852 Hartree BSSE correction: 0.007526024726 Hartree

| Atom | Coordinates / Å |         |          |
|------|-----------------|---------|----------|
|      | X               | Y       | Z        |
| O    | 0.08291         | 5.80887 | 3.73617  |
| O    | 0.36688         | 8.12185 | 5.58070  |
| O    | -1.85091        | 7.51253 | 3.93641  |
| Mo   | -0.10311        | 3.86863 | 3.72000  |
| O    | 0.18602         | 1.94025 | 3.73617  |
| O    | 0.48023         | 3.86863 | 1.85930  |
| O    | 0.35839         | 4.10108 | 5.64096  |
| O    | -1.79667        | 3.98413 | 3.67092  |
| O    | 0.08291         | 5.80887 | 0.01617  |
| O    | 0.35935         | 8.40436 | -1.86070 |
| O    | -1.88888        | 7.93407 | -0.01445 |
| Mo   | -0.10311        | 3.86863 | 0.00000  |
| Mo   | -0.21077        | 7.90837 | 0.00000  |
| O    | 0.18602         | 1.94025 | 0.01617  |
| Mo   | -0.20877        | 7.83329 | 3.72000  |
| O    | 0.37400         | 4.07087 | -1.91121 |
| O    | -1.79834        | 3.97032 | 0.02869  |
| O    | 2.52013         | 5.86430 | 1.87546  |
| O    | 2.41627         | 9.76135 | 1.84290  |
| O    | 4.40017         | 7.98407 | 1.87174  |
| Mo   | 2.80924         | 3.93672 | 1.85930  |
| O    | 2.62324         | 1.99568 | 1.87546  |
| O    | 0.38029         | 7.61837 | 1.85930  |
| O    | 2.22673         | 3.90565 | -0.00141 |
| O    | 2.22590         | 3.93672 | 3.72000  |
| O    | 2.12435         | 7.74690 | -0.00141 |

Density-functional studies of hydrogen peroxide adsorption and dissociation on MoO<sub>3</sub>(100) and H<sub>0.33</sub>MoO<sub>3</sub>(100) surfaces.

| Atom | Coordinates / Å |          |          |
|------|-----------------|----------|----------|
|      | X               | Y        | Z        |
| Mo   | 2.69918         | 8.06633  | 1.85930  |
| O    | 2.12585         | 7.69058  | 3.72000  |
| O    | 4.49815         | 3.81809  | 1.85572  |
| H    | 2.55957         | 7.98759  | 4.52891  |
| H    | -0.17141        | 7.67390  | 6.24967  |
| H    | 2.03595         | 1.71005  | 2.63773  |
| H    | 2.03879         | 1.70870  | 1.10953  |
| H    | 2.64297         | 3.67778  | 4.55049  |
| H    | 0.27484         | 3.27366  | 6.12862  |
| H    | 2.57415         | 8.03878  | -0.80386 |
| H    | -0.32728        | 8.46584  | -2.53821 |
| H    | 0.26161         | 3.24728  | -2.39961 |
| H    | 2.65220         | 3.74602  | -0.85246 |
| H    | 1.05540         | 5.88118  | 3.57965  |
| H    | 1.01279         | 5.89828  | 0.32875  |
| O    | 0.30903         | 10.11864 | 3.52942  |
| O    | -0.80033        | 9.64247  | 2.70544  |
| H    | -0.38087        | 9.30722  | 1.40186  |
| H    | -0.14598        | 10.65774 | 4.20121  |

Density-functional studies of hydrogen peroxide adsorption and dissociation on MoO<sub>3</sub>(100) and H<sub>0.33</sub>MoO<sub>3</sub>(100) surfaces.

**L. HOOH + Mo<sub>6</sub>O<sub>23</sub>H<sub>10</sub> + 2H Hydrogen Bronze “TS4” Transition State Structure**

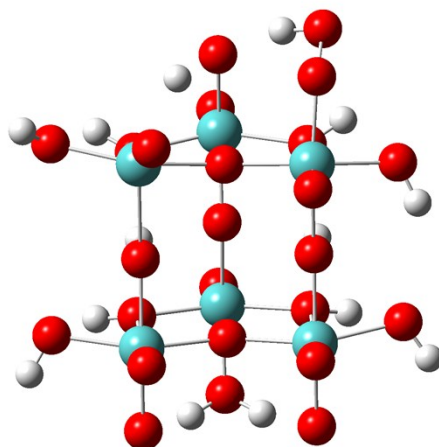

Total B3LYP Energy: -2295.19272773 Hartree BSSE correction: 0.008183934595 Hartree

| Atom | Coordinates / Å |         |          |
|------|-----------------|---------|----------|
|      | X               | Y       | Z        |
| O    | 0.08291         | 5.80887 | 3.73617  |
| O    | 0.37780         | 7.71220 | 5.58071  |
| O    | -1.89385        | 7.82413 | 3.66375  |
| Mo   | -0.10311        | 3.86863 | 3.72000  |
| O    | 0.18602         | 1.94025 | 3.73617  |
| O    | 0.48023         | 3.86863 | 1.85930  |
| O    | 0.38004         | 4.15154 | 5.63842  |
| O    | -1.79370        | 3.96663 | 3.66234  |
| O    | 0.08291         | 5.80887 | 0.01617  |
| O    | 0.36096         | 8.34396 | -1.86070 |
| O    | -1.69871        | 8.77655 | 0.21908  |
| Mo   | -0.10311        | 3.86863 | 0.00000  |
| Mo   | -0.21360        | 8.01440 | 0.00000  |
| O    | 0.18602         | 1.94025 | 0.01617  |
| Mo   | -0.21053        | 7.89927 | 3.72000  |
| O    | 0.40210         | 4.06822 | -1.90618 |
| O    | -1.79671        | 3.96673 | 0.03295  |
| O    | 2.52013         | 5.86430 | 1.87546  |
| O    | 2.41968         | 9.63345 | 1.84397  |
| O    | 4.40149         | 7.84080 | 1.84829  |
| Mo   | 2.80924         | 3.93672 | 1.85930  |
| O    | 2.62324         | 1.99568 | 1.87546  |
| O    | 0.37607         | 7.77687 | 1.85930  |
| O    | 2.22673         | 3.90565 | -0.00141 |

Density-functional studies of hydrogen peroxide adsorption and dissociation on MoO<sub>3</sub>(100) and H<sub>0.33</sub>MoO<sub>3</sub>(100) surfaces.

| Atom | Coordinates / Å |          |          |
|------|-----------------|----------|----------|
|      | X               | Y        | Z        |
| O    | 2.22590         | 3.93672  | 3.72000  |
| O    | 2.12820         | 7.60241  | -0.00141 |
| Mo   | 2.70553         | 7.82794  | 1.85930  |
| O    | 2.12655         | 7.66451  | 3.72000  |
| O    | 4.49678         | 3.84788  | 1.85171  |
| H    | 2.51068         | 8.07014  | 4.50923  |
| H    | 0.22414         | 6.84382  | 5.98722  |
| H    | 2.03670         | 1.71157  | 2.64228  |
| H    | 2.02910         | 1.71233  | 1.11156  |
| H    | 2.66174         | 3.72751  | 4.55627  |
| H    | 0.28582         | 3.35336  | 6.17098  |
| H    | 2.59051         | 7.94033  | -0.78044 |
| H    | -0.21461        | 8.81481  | -2.47889 |
| H    | 0.29267         | 3.24772  | -2.40067 |
| H    | 2.64340         | 3.75500  | -0.86013 |
| H    | 1.05191         | 5.89704  | 3.85653  |
| H    | 1.05214         | 5.94732  | 0.02703  |
| O    | 0.00974         | 9.78265  | 3.86418  |
| O    | 1.20035         | 10.49572 | 4.05649  |
| H    | 1.69483         | 10.33300 | 3.20815  |
| H    | 1.18269         | 9.48678  | 0.92051  |



Density-functional studies of hydrogen peroxide adsorption and dissociation on  $\text{MoO}_3(100)$  and  $\text{H}_{0.33}\text{MoO}_3(100)$  surfaces.

**M.  $\text{HOOH} + \text{Mo}_6\text{O}_{23}\text{H}_{10} + 2\text{H}$  Hydrogen Bronze “TS5” Transition State Structure**

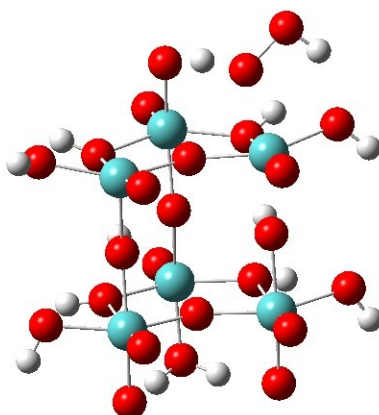

Total B3LYP Energy: -2295.26640455 Hartree BSSE correction: 0.007457737366 Hartree

| Atom | Coordinates / Å |         |          |
|------|-----------------|---------|----------|
|      | X               | Y       | Z        |
| O    | 0.08291         | 5.80887 | 3.73617  |
| O    | 0.36260         | 8.28228 | 5.58070  |
| O    | -1.88912        | 8.06290 | 3.67209  |
| Mo   | -0.10311        | 3.86863 | 3.72000  |
| O    | 0.18602         | 1.94025 | 3.73617  |
| O    | 0.48023         | 3.86863 | 1.85930  |
| O    | 0.39063         | 4.06623 | 5.63958  |
| O    | -1.79510        | 3.96158 | 3.66682  |
| O    | 0.08291         | 5.80887 | 0.01617  |
| O    | 0.36271         | 8.27844 | -1.86070 |
| O    | -1.85454        | 8.06852 | 0.21923  |
| Mo   | -0.10311        | 3.86863 | 0.00000  |
| Mo   | -0.20844        | 7.82105 | 0.00000  |
| O    | 0.18602         | 1.94025 | 0.01617  |
| Mo   | -0.21239        | 7.96912 | 3.72000  |
| O    | 0.40414         | 4.08551 | -1.90230 |
| O    | -1.79615        | 3.97719 | 0.02096  |
| O    | 2.52013         | 5.86430 | 1.87546  |
| O    | 2.41843         | 9.68022 | 1.84358  |
| O    | 4.39597         | 7.88700 | 1.78830  |
| Mo   | 2.80924         | 3.93672 | 1.85930  |
| O    | 2.62324         | 1.99568 | 1.87546  |
| O    | 0.37330         | 7.88085 | 1.85930  |
| O    | 2.22673         | 3.90565 | -0.00141 |
| O    | 2.22590         | 3.93672 | 3.72000  |
| O    | 2.12724         | 7.63855 | -0.00141 |
| Mo   | 2.70406         | 7.88314 | 1.85930  |

Density-functional studies of hydrogen peroxide adsorption and dissociation on MoO<sub>3</sub>(100) and H<sub>0.33</sub>MoO<sub>3</sub>(100) surfaces.

| Atom | Coordinates / Å |          |          |
|------|-----------------|----------|----------|
|      | X               | Y        | Z        |
| O    | 2.12745         | 7.63051  | 3.72000  |
| O    | 4.49670         | 3.84414  | 1.86119  |
| H    | 2.55306         | 8.02551  | 4.49316  |
| H    | 0.16361         | 7.65336  | 6.28546  |
| H    | 2.02222         | 1.71951  | 2.63801  |
| H    | 2.03911         | 1.70714  | 1.10781  |
| H    | 2.63655         | 3.70515  | 4.56347  |
| H    | 0.31179         | 3.22968  | 6.11264  |
| H    | 2.58094         | 7.97604  | -0.78518 |
| H    | -0.30933        | 8.53661  | -2.50521 |
| H    | 0.28387         | 3.27555  | -2.41148 |
| H    | 2.64252         | 3.76929  | -0.86280 |
| H    | 1.05243         | 5.92448  | 3.80605  |
| H    | 1.05181         | 5.88927  | 0.16908  |
| O    | 0.55653         | 9.89260  | 3.43752  |
| H    | 1.50974         | 9.93805  | 2.57505  |
| O    | 0.94275         | 10.69677 | 4.57544  |
| H    | 0.78009         | 10.06718 | 5.31253  |

Density-functional studies of hydrogen peroxide adsorption and dissociation on MoO<sub>3</sub>(100) and H<sub>0.33</sub>MoO<sub>3</sub>(100) surfaces.

**N. HOOH + Mo<sub>6</sub>O<sub>23</sub>H<sub>10</sub> + 2H Hydrogen Bronze “TS6” Transition State Structure**

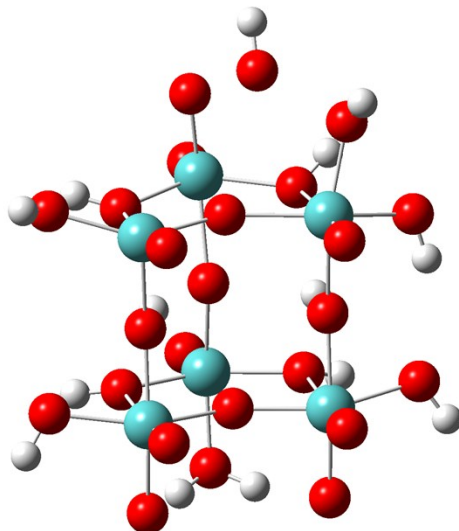

Total B3LYP Energy: -2295.22928909 Hartree BSSE correction: 0.007614363472 Hartree

| Atom | Coordinates / Å |         |          |
|------|-----------------|---------|----------|
|      | X               | Y       | Z        |
| O    | 0.08291         | 5.80887 | 3.73617  |
| O    | 0.38036         | 7.61594 | 5.58070  |
| O    | -1.88961        | 7.89998 | 3.65310  |
| Mo   | -0.10311        | 3.86863 | 3.72000  |
| O    | 0.18602         | 1.94025 | 3.73617  |
| O    | 0.48023         | 3.86863 | 1.85930  |
| O    | 0.36320         | 4.13600 | 5.64160  |
| O    | -1.79482        | 3.96579 | 3.65510  |
| O    | 0.08291         | 5.80887 | 0.01617  |
| O    | 0.36129         | 8.33181 | -1.86070 |
| O    | -1.84452        | 8.05519 | 0.03404  |
| Mo   | -0.10311        | 3.86863 | 0.00000  |
| Mo   | -0.19074        | 7.79106 | -0.08081 |
| O    | 0.18602         | 1.94025 | 0.01617  |
| Mo   | -0.20296        | 7.91738 | 3.73028  |
| O    | 0.37194         | 4.12324 | -1.90538 |
| O    | -1.79757        | 3.98424 | 0.02170  |
| O    | 2.52013         | 5.86430 | 1.87546  |
| O    | 2.86141         | 9.72057 | 1.65138  |
| O    | 4.65036         | 7.72965 | 1.99383  |
| Mo   | 2.80924         | 3.93672 | 1.85930  |
| O    | 2.62324         | 1.99568 | 1.87546  |
| O    | 0.35397         | 7.94780 | 1.73778  |

Density-functional studies of hydrogen peroxide adsorption and dissociation on MoO<sub>3</sub>(100) and H<sub>0.33</sub>MoO<sub>3</sub>(100) surfaces.

| Atom | Coordinates / Å |          |          |
|------|-----------------|----------|----------|
|      | X               | Y        | Z        |
| O    | 2.22673         | 3.90565  | -0.00141 |
| O    | 2.22590         | 3.93672  | 3.72000  |
| O    | 2.11940         | 7.69502  | 0.02478  |
| Mo   | 2.97816         | 7.96869  | 1.82328  |
| O    | 2.18543         | 7.80287  | 3.63168  |
| O    | 4.49648         | 3.83110  | 1.83467  |
| H    | 2.49496         | 8.36724  | 4.35515  |
| H    | 0.35027         | 6.67868  | 5.83737  |
| H    | 2.02558         | 1.71514  | 2.63459  |
| H    | 2.05627         | 1.69728  | 1.10487  |
| H    | 2.64631         | 3.67393  | 4.54838  |
| H    | 0.25835         | 3.33660  | 6.17013  |
| H    | 2.57089         | 7.90615  | -0.80315 |
| H    | -0.29538        | 8.59104  | -2.52178 |
| H    | 0.23797         | 3.32542  | -2.43001 |
| H    | 2.66540         | 3.75806  | -0.84765 |
| H    | 1.06080         | 5.89885  | 3.72479  |
| H    | 0.99640         | 5.88904  | 0.40035  |
| O    | 0.02067         | 9.76471  | 4.18368  |
| O    | 1.44438         | 10.53308 | 2.70488  |
| H    | 1.81057         | 11.43487 | 2.69948  |
| H    | -0.72586        | 10.35892 | 4.33667  |

Density-functional studies of hydrogen peroxide adsorption and dissociation on  $\text{MoO}_3(100)$  and  $\text{H}_{0.33}\text{MoO}_3(100)$  surfaces.

**O.  $\text{HOOH} + \text{Mo}_6\text{O}_{23}\text{H}_{10} + 2\text{H}$  Hydrogen Bronze “TS7” Transition State Structure**

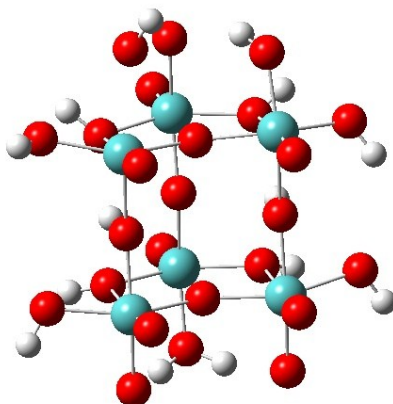

Total B3LYP Energy: -2295.25241536 Hartree BSSE correction: 0.009744753109 Hartree

| Atom | Coordinates / Å |         |          |
|------|-----------------|---------|----------|
|      | X               | Y       | Z        |
| O    | 0.08291         | 5.80887 | 3.73617  |
| O    | 0.37561         | 7.79403 | 5.58071  |
| O    | -1.89466        | 7.86912 | 3.69684  |
| Mo   | -0.10311        | 3.86863 | 3.72000  |
| O    | 0.18602         | 1.94025 | 3.73617  |
| O    | 0.48023         | 3.86863 | 1.85930  |
| O    | 0.34637         | 4.12696 | 5.64614  |
| O    | -1.79404        | 3.96820 | 3.63683  |
| O    | 0.08291         | 5.80887 | 0.01617  |
| O    | 0.36239         | 8.29048 | -1.86070 |
| O    | -1.87216        | 8.04794 | -0.00432 |
| Mo   | -0.10311        | 3.86863 | 0.00000  |
| Mo   | -0.20920        | 7.84933 | 0.00000  |
| O    | 0.18602         | 1.94025 | 0.01617  |
| Mo   | -0.21148        | 7.93482 | 3.72000  |
| O    | 0.36308         | 4.11690 | -1.90898 |
| O    | -1.79533        | 3.99207 | 0.06594  |
| O    | 2.52013         | 5.86430 | 1.87546  |
| O    | 2.41801         | 9.69621 | 1.84345  |
| O    | 4.39834         | 7.86587 | 1.82621  |
| Mo   | 2.80924         | 3.93672 | 1.85930  |
| O    | 2.62324         | 1.99568 | 1.87546  |
| O    | 0.37580         | 7.78714 | 1.85930  |
| O    | 2.22673         | 3.90565 | -0.00141 |
| O    | 2.22590         | 3.93672 | 3.72000  |
| O    | 2.12775         | 7.61939 | -0.00141 |
| Mo   | 2.70694         | 7.77510 | 1.85930  |

Density-functional studies of hydrogen peroxide adsorption and dissociation on MoO<sub>3</sub>(100) and H<sub>0.33</sub>MoO<sub>3</sub>(100) surfaces.

| Atom | Coordinates / Å |          |          |
|------|-----------------|----------|----------|
|      | X               | Y        | Z        |
| O    | 2.12642         | 7.66916  | 3.72000  |
| O    | 4.49706         | 3.86759  | 1.87324  |
| H    | 2.51927         | 8.07665  | 4.50115  |
| H    | 0.09709         | 6.99769  | 6.06001  |
| H    | 2.03253         | 1.71314  | 2.63847  |
| H    | 2.04594         | 1.70482  | 1.10729  |
| H    | 2.65705         | 3.65969  | 4.53753  |
| H    | 0.27880         | 3.30999  | 6.15335  |
| H    | 2.46769         | 8.21008  | -0.68847 |
| H    | -0.32335        | 8.38093  | -2.53661 |
| H    | 0.30683         | 3.30173  | -2.42025 |
| H    | 2.67192         | 3.70867  | -0.83428 |
| H    | 1.04655         | 5.90412  | 3.89029  |
| H    | 1.05504         | 5.91142  | -0.11186 |
| O    | 0.17034         | 9.78723  | 3.64618  |
| H    | 1.03817         | 10.02729 | 3.25922  |
| O    | 1.19577         | 9.94747  | 0.61046  |
| H    | 0.77532         | 10.70818 | 1.04000  |

Density-functional studies of hydrogen peroxide adsorption and dissociation on MoO<sub>3</sub>(100) and H<sub>0.33</sub>MoO<sub>3</sub>(100) surfaces.

**P. HOOH + Mo<sub>6</sub>O<sub>23</sub>H<sub>10</sub> + 2H Hydrogen Bronze “TS8” Transition State Structure**

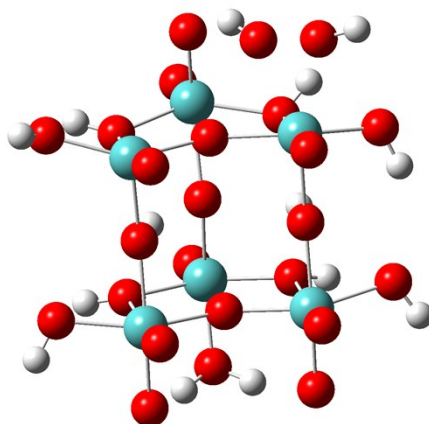

Total B3LYP Energy: -2295.23260243 Hartree BSSE correction: 0.006561538891 Hartree

| Atom | Coordinates / Å |         |          |
|------|-----------------|---------|----------|
|      | X               | Y       | Z        |
| O    | 0.08291         | 5.80887 | 3.73617  |
| O    | 0.37848         | 7.68645 | 5.58071  |
| O    | -1.82243        | 8.01737 | 3.60987  |
| Mo   | -0.10311        | 3.86863 | 3.72000  |
| O    | 0.18602         | 1.94025 | 3.73617  |
| O    | 0.48023         | 3.86863 | 1.85930  |
| O    | 0.35594         | 4.14087 | 5.64225  |
| O    | -1.79419        | 3.97064 | 3.64879  |
| O    | 0.08291         | 5.80887 | 0.01617  |
| O    | 0.36045         | 8.36310 | -1.86070 |
| O    | -1.80561        | 8.04145 | 0.06518  |
| Mo   | -0.10311        | 3.86863 | 0.00000  |
| Mo   | -0.15558        | 7.78936 | -0.07449 |
| O    | 0.18602         | 1.94025 | 0.01617  |
| Mo   | -0.14538        | 7.90003 | 3.70339  |
| O    | 0.37875         | 4.11294 | -1.90428 |
| O    | -1.79751        | 3.97756 | 0.01937  |
| O    | 2.52013         | 5.86430 | 1.87546  |
| O    | 2.56296         | 9.70143 | 1.80417  |
| O    | 4.57703         | 7.96308 | 1.83269  |
| Mo   | 2.80924         | 3.93672 | 1.85930  |
| O    | 2.62324         | 1.99568 | 1.87546  |
| O    | 0.41503         | 7.87518 | 1.78281  |
| O    | 2.22673         | 3.90565 | -0.00141 |

Density-functional studies of hydrogen peroxide adsorption and dissociation on MoO<sub>3</sub>(100) and H<sub>0.33</sub>MoO<sub>3</sub>(100) surfaces.

| Atom | Coordinates / Å |          |          |
|------|-----------------|----------|----------|
|      | X               | Y        | Z        |
| O    | 2.22590         | 3.93672  | 3.72000  |
| O    | 2.14215         | 7.68770  | -0.00571 |
| Mo   | 2.88097         | 7.99720  | 1.84549  |
| O    | 2.31619         | 7.63637  | 3.71492  |
| O    | 4.49650         | 3.82924  | 1.85989  |
| H    | 2.58358         | 8.24115  | 4.42055  |
| H    | 0.28133         | 6.79005  | 5.94141  |
| H    | 2.03261         | 1.71230  | 2.63821  |
| H    | 2.04718         | 1.70180  | 1.10803  |
| H    | 2.67091         | 3.71535  | 4.54744  |
| H    | 0.28206         | 3.33291  | 6.16300  |
| H    | 2.62811         | 7.89947  | -0.81259 |
| H    | -0.30137        | 8.61366  | -2.51917 |
| H    | 0.23036         | 3.31723  | -2.42839 |
| H    | 2.65342         | 3.75625  | -0.85387 |
| H    | 1.06326         | 5.89143  | 3.77784  |
| H    | 0.98596         | 5.87089  | 0.42648  |
| O    | -0.30421        | 10.19306 | 2.89483  |
| H    | 0.53474         | 10.41474 | 2.44524  |
| O    | 0.68417         | 9.76684  | 4.39941  |
| H    | 0.16924         | 10.04267 | 5.17788  |



Density-functional studies of hydrogen peroxide adsorption and dissociation on MoO<sub>3</sub>(100) and H<sub>0.33</sub>MoO<sub>3</sub>(100) surfaces.

**Q. HOOH + Mo<sub>6</sub>O<sub>23</sub>H<sub>10</sub> + 2H Hydrogen Bronze “TS9” Transition State Structure**

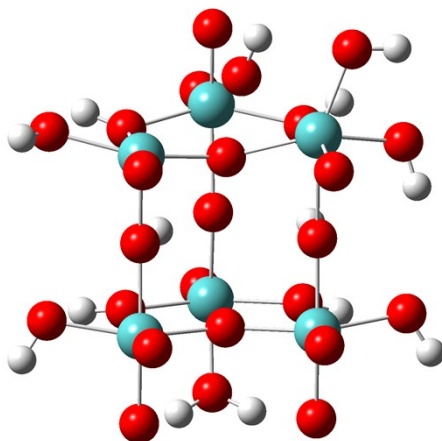

Total B3LYP Energy: -2295.2935978 Hartree BSSE correction: 0.007443492324 Hartree

| Atom | Coordinates / Å |         |          |
|------|-----------------|---------|----------|
|      | X               | Y       | Z        |
| O    | 0.08291         | 5.80887 | 3.73617  |
| O    | 0.37688         | 7.74646 | 5.58071  |
| O    | -1.84673        | 7.67210 | 3.82416  |
| Mo   | -0.10311        | 3.86863 | 3.72000  |
| O    | 0.18602         | 1.94025 | 3.73617  |
| O    | 0.48023         | 3.86863 | 1.85930  |
| O    | 0.34355         | 4.09200 | 5.64834  |
| O    | -1.79462        | 3.95339 | 3.64116  |
| O    | 0.08291         | 5.80887 | 0.01617  |
| O    | 0.36535         | 8.17933 | -1.86070 |
| O    | -1.86630        | 7.81520 | -0.19010 |
| Mo   | -0.10311        | 3.86863 | 0.00000  |
| Mo   | -0.20627        | 7.73957 | 0.00000  |
| O    | 0.18602         | 1.94025 | 0.01617  |
| Mo   | -0.21526        | 8.07676 | 3.72000  |
| O    | 0.35838         | 4.15122 | -1.90385 |
| O    | -1.79776        | 3.99704 | 0.02549  |
| O    | 2.52013         | 5.86430 | 1.87546  |
| O    | 2.41501         | 9.80852 | 1.84251  |
| O    | 4.39788         | 8.02905 | 1.83426  |
| Mo   | 2.80924         | 3.93672 | 1.85930  |
| O    | 2.62324         | 1.99568 | 1.87546  |
| O    | 0.38274         | 7.52674 | 1.85930  |
| O    | 2.22673         | 3.90565 | -0.00141 |

Density-functional studies of hydrogen peroxide adsorption and dissociation on MoO<sub>3</sub>(100) and H<sub>0.33</sub>MoO<sub>3</sub>(100) surfaces.

| Atom | Coordinates / Å |          |          |
|------|-----------------|----------|----------|
|      | X               | Y        | Z        |
| O    | 2.22590         | 3.93672  | 3.72000  |
| O    | 2.12342         | 7.78202  | -0.00141 |
| Mo   | 2.69771         | 8.12126  | 1.85930  |
| O    | 2.12390         | 7.76369  | 3.72000  |
| O    | 4.49759         | 3.81786  | 1.86461  |
| H    | 2.50622         | 8.13605  | 4.52449  |
| H    | 0.19892         | 6.82850  | 5.84492  |
| H    | 2.01858         | 1.71432  | 2.62921  |
| H    | 2.07015         | 1.69165  | 1.10028  |
| H    | 2.64328         | 3.63518  | 4.53657  |
| H    | 0.24888         | 3.27031  | 6.14366  |
| H    | 2.57805         | 8.05468  | -0.80725 |
| H    | -0.34052        | 8.22552  | -2.52347 |
| H    | 0.22906         | 3.36157  | -2.44192 |
| H    | 2.67763         | 3.79431  | -0.84640 |
| H    | 1.05451         | 5.93154  | 3.72746  |
| H    | 0.94865         | 5.86029  | 0.52165  |
| O    | -0.03800        | 9.84762  | 4.44504  |
| O    | -0.62682        | 9.47595  | 2.04430  |
| H    | -0.91435        | 10.34840 | 2.34871  |
| H    | 0.08111         | 9.81306  | 5.40626  |

Density-functional studies of hydrogen peroxide adsorption and dissociation on MoO<sub>3</sub>(100) and H<sub>0.33</sub>MoO<sub>3</sub>(100) surfaces.

**R. HOOH + Mo<sub>6</sub>O<sub>23</sub>H<sub>10</sub> + 2H Hydrogen Bronze “TS10” Transition State Structure**

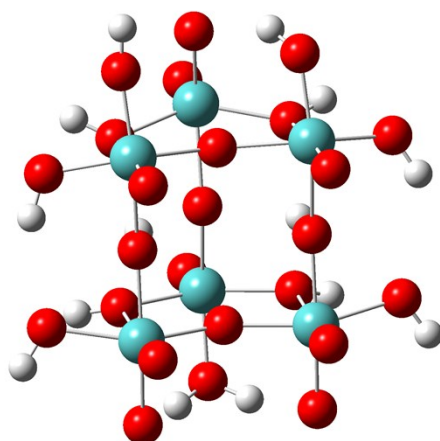

Total B3LYP Energy: -2295.39473788 Hartree BSSE correction: 0.011032539061 Hartree

| Atom | Coordinates / Å |         |          |
|------|-----------------|---------|----------|
|      | X               | Y       | Z        |
| O    | 0.08291         | 5.80887 | 3.73617  |
| O    | 0.37774         | 7.71430 | 5.58071  |
| O    | -1.84499        | 7.80048 | 3.83335  |
| Mo   | -0.10311        | 3.86863 | 3.72000  |
| O    | 0.18602         | 1.94025 | 3.73617  |
| O    | 0.48023         | 3.86863 | 1.85930  |
| O    | 0.35413         | 4.14534 | 5.64706  |
| O    | -1.79512        | 3.96735 | 3.66678  |
| O    | 0.08291         | 5.80887 | 0.01617  |
| O    | 0.38176         | 7.56352 | -1.86070 |
| O    | -1.84253        | 7.79717 | -0.05950 |
| Mo   | -0.10311        | 3.86863 | 0.00000  |
| Mo   | -0.16650        | 7.90315 | -0.05026 |
| O    | 0.18602         | 1.94025 | 0.01617  |
| Mo   | -0.16998        | 7.92111 | 3.75984  |
| O    | 0.37343         | 4.18968 | -1.92000 |
| O    | -1.79582        | 3.95734 | 0.02229  |
| O    | 2.52013         | 5.86430 | 1.87546  |
| O    | 2.46393         | 9.72289 | 1.81665  |
| O    | 4.52294         | 8.01643 | 1.91331  |
| Mo   | 2.80924         | 3.93672 | 1.85930  |
| O    | 2.62324         | 1.99568 | 1.87546  |
| O    | 0.37132         | 7.79141 | 1.83966  |
| O    | 2.22673         | 3.90565 | -0.00141 |

Density-functional studies of hydrogen peroxide adsorption and dissociation on MoO<sub>3</sub>(100) and H<sub>0.33</sub>MoO<sub>3</sub>(100) surfaces.

| Atom | Coordinates / Å |          |          |
|------|-----------------|----------|----------|
|      | X               | Y        | Z        |
| O    | 2.22590         | 3.93672  | 3.72000  |
| O    | 2.21909         | 7.60654  | 0.01603  |
| Mo   | 2.82794         | 8.01725  | 1.87028  |
| O    | 2.20544         | 7.65627  | 3.73457  |
| O    | 4.49741         | 3.81833  | 1.85462  |
| H    | 2.67203         | 7.91057  | 4.53978  |
| H    | 0.13685         | 6.90056  | 6.05405  |
| H    | 2.03152         | 1.71109  | 2.63620  |
| H    | 2.04159         | 1.70657  | 1.10844  |
| H    | 2.63743         | 3.63331  | 4.53860  |
| H    | 0.23580         | 3.34398  | 6.17005  |
| H    | 2.63186         | 7.98429  | -0.77100 |
| H    | 0.33663         | 6.63918  | -2.16774 |
| H    | 0.20293         | 3.42921  | -2.48785 |
| H    | 2.66533         | 3.70812  | -0.83779 |
| H    | 1.06151         | 5.88676  | 3.66844  |
| H    | 1.04074         | 5.89038  | 0.22994  |
| O    | 0.14422         | 9.76332  | 3.63278  |
| O    | 0.13266         | 9.72599  | -0.18923 |
| H    | 0.08552         | 10.68299 | -0.13315 |
| H    | 0.93325         | 10.10370 | 3.16480  |
